# Supplementary material for: Lacustrine methane release on the Tibetan Plateau as an important driver of Early Miocene global warming
Source: Copernicus journal article supplement (doi:10.5194/egusphere-2025-5342), 2025-11-27
Supplement: Supplementary file [file egusphere-2025-5342-RC1-supplement.pdf]

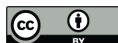

**1 Lacustrine methane release on the Tibetan Plateau as an**  
**2 important driver of Early Miocene global warming**

**3**  
**4 Cheng Yang<sup>1,2,3</sup>, Xiugen Fu<sup>1,2,3,4\*</sup>, Jinxian Deng<sup>1,2,3\*</sup>, Hengye Wei<sup>1,2,3</sup>, Yue Wen<sup>1,2,3</sup>,**  
**5 Tianxiang Wen<sup>1,2,3</sup>, Shengqiang Zeng<sup>5\*</sup>**

**6 <sup>1</sup> School of Geoscience and Technology, Southwest Petroleum University, Chengdu**  
**7 610500, China**

**8 <sup>2</sup> State Key Laboratory of Oil and Gas Reservoir Geology and Exploitation, Southwest**  
**9 Petroleum University, Chengdu**  
**10 610500, China**

**11 <sup>3</sup> Qiangtang institute of Sedimentary Basin, Southwest Petroleum University, Chengdu**  
**12 610500, China**

**13 <sup>4</sup> Qinghai Provincial Key Laboratory of Plateau Saline-Lacustrine Basinal Oil & Gas**  
**14 Geology, Dunhuang**  
**15 736202, China**

**16 <sup>5</sup> Chengdu Center, China Geological Survey (Geosciences Innovation Center of**  
**17 Southwest China), Chengdu 610218, China**

**18 \*Correspondence to: Xiugen Fu (fuxiugen@126.com), Jinxian Deng (448920726@qq.com),**  
**19 Shengqiang Zeng (zengsq@126.com)**

**20 Address: School of Geoscience and Technology, Southwest Petroleum University, Chengdu,**  
**21 610500, China**

**22**

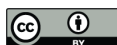

23 **Abstract.** The Early Miocene was a key period of significant global warming. While  
24 previous studies often attributed this warming to the India-Asia collision and associated  
25 volcanism, an alternative mechanism may involve large-scale methane release from  
26 organic-rich lake sediments. To test the hypothesis that methane emissions from Tibetan  
27 Plateau lakes contributed to Early Miocene warming, we analyzed organic carbon,  
28 stable isotopes, and elemental concentrations in samples from the organic-rich  
29 Dingqinghu Formation in the Lunpola Basin, central Tibetan Plateau. Our results  
30 identify an exceptionally strong positive carbonate carbon isotope excursion ( $\delta^{13}\text{C}_{\text{carb}}$   
31 up to +13.79‰) within the lacustrine deposits. The large carbon isotope difference  
32 between carbonate and organic matter ( $\Delta^{13}\text{C} > 32\text{‰}$ ) indicates that methanogenesis,  
33 specifically via acetate fermentation, was the dominant microbial process. Extremely  
34 low sulfur contents likely suppressed sulfate-driven anaerobic oxidation of methane,  
35 facilitating direct methane release to the atmosphere. Furthermore, volcanic activity  
36 during this interval was limited, suggesting a negligible role in carbon cycle  
37 perturbations. The close temporal correspondence between Early Miocene warming,  
38 rising atmospheric  $\text{CO}_2$ , and methane emissions documented on the Tibetan Plateau  
39 indicates that methane release from these plateau lakes may have played an important  
40 role in driving global warming and increasing contemporary  $\text{CO}_2$  levels.

41

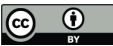

**1 Introduction**

The Cenozoic era witnessed several global warming episodes, such the Paleocene-Eocene Thermal Maximum and the Middle Miocene Climatic Optimum, with temperatures and atmospheric CO<sub>2</sub> concentrations significantly exceeding pre-industrial levels (Methner et al., 2020; Cenozoic CO<sub>2</sub> Proxy Integration Project (CenCO2PIP) Consortium, 2023; Ivany et al., 2025). This period was also defined by continental collision between India and Eurasia and the subsequent uplift of the Tibetan Plateau, a tectonic event that profoundly reshaped Asian climate and potentially influenced global patterns (Wang et al., 2008; Yang et al., 2022; Zhang et al., 2024; Zhang et al., 2025). The temporal coincidence of these events has led to the hypothesis that the India-Asia collision and its associated volcanism may have been a primary driver of Cenozoic warming (Gutjahr et al., 2017; Kender et al., 2021; Tremblin et al., 2022).

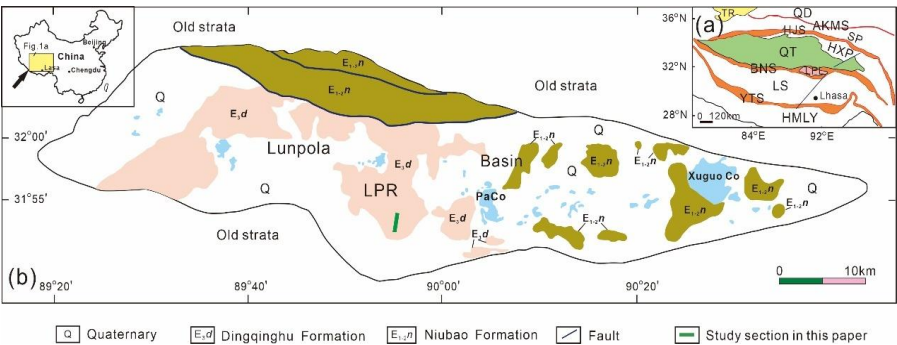

Figure 1: (a) Map of the Tibetan plateau showing major terranes. (b) Simplified geological map of the Lunpola Basin, showing location of sampling section. AKMS, Anyimaqen–Kunlun–Muztagh Suture; BNS, Bangong Lake–Nujiang River Suture; HJS, Hoh Xil–Jinsha River Suture; HMLY, Himalayas; HXP, Hoh Xili piedmont zone; LPL, Lunpola Basin; LS, Lhasa terrane; QD, Qaidam; QT, Qiagtang Basin; SP, Songpan–Ganzi flysch complex; TR, Tarim Basin; YTS, Yarlung Tsangpo Suture (modified from Fu et al., 2015).

However, Cenozoic volcanism on the Tibetan Plateau, while episodic, was relatively limited in scale (Xie et al., 2024). For instance, during the third volcanic phase (ca. 28–18 Ma), activity was largely confined to restricted areas like the Lunpola Basin, with

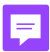

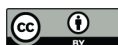

64 significantly reduced spatial distribution and magma volume compared to earlier stages  
65 (Wang et al., 2024). Consequently, although regional magmatic events reflect the  
66 tectonic-magmatic evolution of the Plateau, their associated volatile fluxes were likely  
67 negligible on a global scale compared to large igneous provinces (Zhang et al., 2021).  
68 This suggests that the direct contribution of Tibetan volcanism to the rise in atmospheric  
69 CO<sub>2</sub> and global warming was probably limited.

70 An alternative mechanism for driving warming may involve large-scale methane  
71 release from organic-rich lake sediments. During diagenesis and burial, microbial  
72 methanogenesis in such sediments can generate substantial methane (CH<sub>4</sub>) (Martens  
73 and Berner, 1974; Whiticar, 1999; Bastviken et al., 2004; Dean et al., 2018). Under  
74 stratified or anoxic lacustrine conditions, this methane can accumulate and be released  
75 to atmosphere via ebullition and diffusion (Bastviken et al., 2004; Encinas Fernández  
76 et al., 2014; DelSontro et al., 2016). Lakes are a significant natural source of methane  
77 emissions, and during specific geological intervals, widespread organic-rich lacustrine  
78 systems could have release methane at a scale capable of influencing the global climate  
79 system by enhancing the greenhouse effect and perturbing the carbon cycle (Dean et al.,  
80 2018; Sun et al., 2022; Zhuang et al., 2023). Consequently, organic-enriched lake  
81 sediments act not only a crucial long-term carbon sink but also, under certain conditions,  
82 as a potent methane source, with substantial implications for both paleoclimate and  
83 contemporary climate system.

84 During the Miocene, the Tibetan Plateau hosted extensive lacustrine systems. The  
85 Lunpola and Nima basins, for example, preserve thick successions of organic-rich  
86 deposits and oil shales. In the Dingqinghu Formation, these successions reach  
87 thicknesses exceeding 148 m and exhibit total organic carbon (TOC) contents of up to  
88 17.60% (Fu et al., 2012; Fang et al., 2020; Fu et al., 2020; Lu, 2023; Zeng et al., 2024).  
89 These deposits not only record high organic carbon accumulation but also represent a  
90 potential source of large methane emissions during deposition and early diagenesis,  
91 which could have contributed to regional or even global warming (Zhou et al., 2024;



92 Nie et al., 2023).

93 To test the hypothesis that methane release from Tibetan Plateau lakes contributed to  
94 Early Miocene warming, we conducted organic carbon, stable isotope, and element  
95 analyses on samples from the Dingqinghu Formation in the Lunpola Basin (Fig. 1a).  
96 Integrated with a robust chronological framework (Mao et al., 2019), this multi-proxy  
97 dataset allows us to correlate regional geological events with global climate records and  
98 evaluate the potential mechanisms driving Early Miocene climate warming.

## 99 **2 Geological setting**

100 The Lunpola Basin is a Cenozoic fault-depression basin located on the central Tibetan  
101 Plateau, within the central segment of the Bangong-Nujiang Suture Zone (BNSZ), a  
102 major tectonic boundary separating the Lhasa and Qiangtang terranes. The basin  
103 extends approximately 200 km from east to west and 10–30 km from north to south,  
104 and is recognized as the highest-altitude petroleum-bearing basin in the world (Deng et  
105 al., 2012; Rowley & Currie, 2006; Fu et al., 2012; Wang et al., 2025).

106 The Tibetan Plateau comprises a series of east-striking tectonic units bounded by  
107 major suture zones. From north to south, they are the Kunlun-Qaidam Terrane, the  
108 Songpan-Ganzi flysch complex, the Qiangtang Terrane, and the Lhasa Terrane,  
109 separated by the Anyimaqen-Kunlun-Muztagh, Hoh Xil-Jinsha River, and Bangong  
110 Lake-Nujiang River (BNS) suture zones, respectively (Fig. 1a). The BNS originated  
111 from the diachronous, west-to-east closure of the Meso-Tethyan ocean basin,  
112 culminating in the Late Jurassic–Early Cretaceous Lhasa-Qiangtang collision (Kapp  
113 and DeCelles, 2019). It was later reactivated during contractional events in the latest  
114 Cretaceous and Oligocene–early Miocene, which led to the development of  
115 intermontane basins in central Tibet, including the Lunpola, Nima, and Gerze basins  
116 (e.g., Wei et al., 2017; Han et al., 2019).

117 Structurally, the basin is influenced by strike-slip and thrust faulting, forming a pod-  
118 like framework characterized by “north–south structural zoning and east–west fault  
119 blocking.” In the north–south direction, the basin exhibits high flanks and a central



120 depression. The southern margin is controlled by thrust belts and uplifts, while the  
 121 northern part shows localized highs despite significant subsidence and thick  
 122 sedimentary infill. The cumulative thickness of the Niubao and Dingqinghu formations  
 123 exceeds 3,000 m. East–west segmentation by faults results in a pattern of peripheral  
 124 uplift and central subsidence (Lei et al., 1997).

125 The tectonic evolution of the Lunpola Basin involved two main stages. The Eocene  
 126 rifting, during which the Niubao Formation ( $E_{1-2n}$ ) was deposited, consisting mainly of  
 127 alluvial fan to fan-delta coarse clastics. The Oligocene depression, marked by  
 128 accumulation of the Dingqinghu Formation ( $E_{3d}$ ), dominated by deep lacustrine fine-  
 129 grained mudstones and oil shales (Deng et al., 2012; Lu, 2023). The Dingqinghu  
 130 Formation is distributed primarily in the central and western parts of the basin, with  
 131 thickness varying from 300 to 1,100 m due to differential basement subsidence. It  
 132 comprises greenish-gray shales, mudstones, and oil shales interbedded with thin  
 133 sandstones, interpreted as having been deposited in a low-energy, semi-deep to deep  
 134 lacustrine environment under stable and strongly reducing conditions (Fu et al., 2015).  
 135 This study focuses on the middle member of the Dingqinghu Formation, which is  
 136 Early Miocene in age (ca.  $20.6 \pm 0.1$  Ma; Mao et al., 2019) and consists of organic-rich  
 137 mudstones, shales, and oil shales. These oil shale samples are dark brown to black in  
 138 color and contain high organic matter content.

### 139 **3 Method**

140 The study area and section location are presented in Fig. 1. The vertical distribution  
 141 of samples within the section is presented in Figs. S1. A total of 63 samples were  
 142 collected from the Lunpola oil shale section. The average vertical sampling interval is  
 143 60 cm.

#### 144 *3.1 TOC analysis*

145 First, grind the 10 mg rock sample into a powder with a particle size smaller than 200  
 146 mesh. Then, depending on the lithology and colour of the sample, 0.095–0.105 g of the



147 powdered rock is weighed into a crucible and placed into the container. Slowly add 10%  
148 HCl along the inner wall of the container (ensuring it does not overflow the crucible  
149 opening), then allow it to decarburise for over 24 hours until the reaction is complete.  
150 Remove the crucible, rinse the sample with high-purity water to wash away residual  
151 acid, and continue washing until the rinse water is neutral. After washing, the samples  
152 were dried in an electric thermostatic drying oven at 60–80°C and then analysed for  
153 TOC content using an LDH CS analyser (Model: TK851-6K) at the Qiangtang Institute  
154 of Sedimentary Basin, Southwest Petroleum University. For every 10 samples, a  
155 parallel sample was included for quality control. Results were recorded in wt%, with  
156 an analytical accuracy better than  $\pm 0.1\%$ .

### 157 3.2 Inorganic carbon and oxygen isotope analysis

158 Carbon isotope samples were analysed in the laboratory of the Qiangtang Institute of  
159 Sedimentary Basin. First, an appropriate amount of carbonate sample was ground with  
160 an agate mortar to less than 200 mesh, then dried in an oven at 60°C for approximately  
161 4 hours to remove adsorbed water. Then, approximately 1 mg of the sample was placed  
162 into the sample tube of the GasBench Plus sample preparation system. The sample was  
163 dried at 70°C, the tube was sealed, and the air in the sample tube was purged with high-  
164 purity helium (He). Using an acid pump with an acid needle, excess 100% phosphoric  
165 acid ( $\text{H}_3\text{PO}_4$ ) was added to the sample tube. The phosphoric acid was allowed to react  
166 with the carbonate sample to produce  $\text{CO}_2$  gas. The generated  $\text{CO}_2$  was then carried by  
167 high-purity helium into the Delta Q (Thermo Fisher) system, where the carbon and  
168 oxygen isotopic compositions were measured. A standard reference material was  
169 analysed after every 12 samples for quality control. Results were reported in  $\delta^{13}\text{C}$  V-  
170 PDB and  $\delta^{18}\text{O}$  V-PDB values relative to the PDB standard. The GB04416 carbonate  
171 standard yielded  $\delta^{13}\text{C} = 1.67 \pm 0.05\%$ , and measurement accuracy was  $\pm 0.05\%$ .  
172 For carbonate samples, analytical reproducibility of replicate standards was better than  
173  $\pm 0.07\%$ .



174 3.3 *Organic carbon isotope analysis*

175 The whole rock powder sample was decarbonised with 10% HCl for 48 hours to  
176 eliminate all carbonate components, then washed with ultra-pure water until neutral,  
177 and the residual sample was dried, ground to less than 200 mesh, weighed 0.2 to 5 mg  
178 of residual powder sample into a tin cup, and tightly wrapped into cubes. Under the He  
179 atmosphere, the gas is sent into the high-temperature oxidation tube through the EA  
180 auto-sampler and instantly oxidised at 980°C in an oxygen atmosphere to generate a  
181 mixture of various gas components such as NO, N<sub>2</sub>O, N<sub>2</sub>O<sub>2</sub>, N<sub>2</sub>, CO, CO<sub>2</sub>, H<sub>2</sub>O, SO<sub>2</sub>  
182 and halogen. In the reaction tube, CO is oxidised to CO<sub>2</sub> by chromium oxide and silver-  
183 coated cobalt oxide, and SO<sub>2</sub> and halogen gases are removed. Subsequently, in a  
184 reduction tube at 650°C, copper wire reduces nitrogen oxides to N<sub>2</sub> and absorbs excess  
185 O<sub>2</sub>. The resulting helium and carbon dioxide gases pass through a magnesium  
186 perchlorate chemical trap to remove moisture, and then are separated by a  
187 chromatographic column into N<sub>2</sub> and CO<sub>2</sub>, which enter a thermal conductivity detector  
188 (TCD) to determine the carbon content. A small amount of CO<sub>2</sub> is then introduced into  
189 a connected Delta Q mass spectrometer via a continuous flow ConFIV system to  
190 measure the isotope ratio. All carbon isotope values are reported in the conventional  $\delta$   
191 -notation in per mil relative to V-PDB (Vienna-PDB). The accuracy and reproducibility  
192 of the analysis were checked through repeated tests of the international standard sample  
193 USGS40, and the accuracy (1 $\sigma$ ) was less than 0.09‰. The repeatability test accuracy  
194 of the sample is less than 0.13‰.

195 3.4 *Total nitrogen (TN) and nitrogen isotope ( $\delta^{15}\text{N}$ )*

196 The total nitrogen (TN) and nitrogen isotope ( $\delta^{15}\text{N}$ ) contents of samples were measured  
197 at Qiangtang Institute of Sedimentary Basin, Southwest Petroleum University, China,  
198 using a Vario Macro Cube elemental analyser (Elementar, Hanau, Germany).  
199 Approximately 200 mg of the powder samples were weighed, and then add 50 mg of  
200 WO<sub>3</sub> oxidant. The mixture was tightly enclosed with a 35 × 35 mm tin capsule and  
201 prepared for analysis. Standard deviations for carbon, nitrogen and sulfur contents are



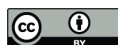

202 <0.05 wt% (1 $\sigma$ ) based on replicate analyses of multiple samples. Thus, the analytical  
 203 precision of TN measurements was always better than 0.05 wt.%.

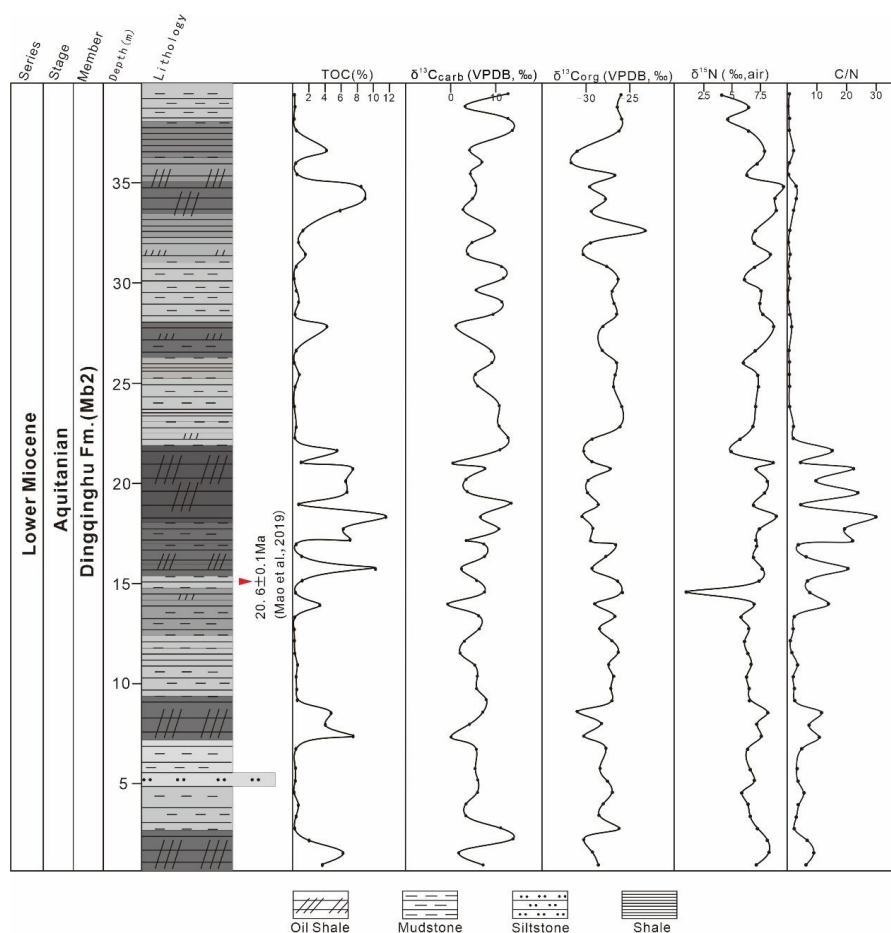

204  
 205 Figure 2: TOC,  $\delta^{13}\text{C}_{\text{carb}}$  (the Carbonate carbon isotope),  $\delta^{13}\text{C}_{\text{org}}$  (the Organic Carbon Isotope),  $\delta^{15}\text{N}$   
 206 (the Organic Nitrogen isotope) and C/N ratio data in Dingqinghu Formation of lunpola basin.

### 207 3.5 The major elements and trace elements

208 Elemental analyses were conducted at the Qiangtang Basin Research Institute,  
 209 Southwest Petroleum University. Powdered samples (<200 mesh) were packed into  
 210 Chemplex cups, compacted, and sealed with polypropylene film. Major and selected  
 211 trace element concentrations (including Ca, Mg, Ba, Cu, Ni, V and Sr) were measured  
 212 using a Bruker S1 TITAN 800 X-ray fluorescence (XRF) spectrometer manufactured



213 by Bruker, Germany. The standard deviation for major elements was better than  $\pm$   
214 0.05%, and that for trace elements was better than  $\pm 20 \mu\text{g/g}$ .

## 215 **4 Result**

### 216 *4.1 TOC content*

217 The total organic carbon content of mudstone and oil shale samples from the Second  
218 Member of the Dingqinghu formation is illustrated in Fig. 2. The TOC values exhibit a  
219 wide variation range (0.12%-11.54%), with an average of 2.35%, categorizing these  
220 strata as high-quality source rocks. Notably, the oil shale intervals demonstrate  
221 exceptional organic enrichment, characterized by TOC values spanning 0.56%-11.54%,  
222 with an average of 5.37%, which exceeds the threshold for effective hydrocarbon  
223 generation in lacustrine systems. In contrast, the interbedded mudstones and shales  
224 display comparatively lower TOC concentrations, ranging from 0.12% to 7.36%, with  
225 an average of 0.91%.

### 226 *4.2 Stable Isotope geochemistry*

227 As shown in Fig. 2, the variations of  $\delta^{13}\text{C}_{\text{carb}}$  values of the second member of the  
228 Dingqinghu formation exhibit an extreme positive excursion, ranging from -0.84‰ to  
229 13.79‰, with an average of 6.59‰. The variation curve of  $\delta^{13}\text{C}_{\text{carb}}$  values reveals that  
230 mudstone intervals display the most pronounced positive excursion (1.23‰–13.67‰,  
231 averaging 7.39‰), while oil shale intervals show relatively lower values (-0.84‰–  
232 13.79‰, averaging 4.91‰). The  $\delta^{13}\text{C}_{\text{org}}$  values of the Second Member of the  
233 Dingqinghu Formation range from -31.64‰ to -23.31‰, with an average value of -  
234 27.97‰. The  $\delta^{13}\text{C}_{\text{org}}$  curve demonstrates a negative excursion in the oil shale layers,  
235 where values vary between -31.03‰ and -26.76‰ (average: -29.34‰). In contrast,  
236 the mudstone intervals exhibit a positive excursion, with a broader  $\delta^{13}\text{C}_{\text{org}}$  range of -  
237 31.64‰ to -23.31‰ and an average of -27.33‰. The curves of  $\delta^{13}\text{C}_{\text{carb}}$  and  $\delta^{13}\text{C}_{\text{org}}$   
238 exhibit high coupling, which reflect the synergistic response mechanism of lake carbon  
239 cycle and climate environment. The organic nitrogen isotope values ( $\delta^{15}\text{N}(\text{‰}, \text{air})$ ) of



240 the Second Member of the Dingqinghu Formation range from 1.06‰ to 9.74‰, with  
 241 an average value of 7.11‰.

## 242 **5 Discussion**

### 243 *5.1 Influence of modifying factors*

244 Since both carbonates and organic matter can preserve diagenetic information rather  
 245 than primary depositional signals after sedimentation, the influence of diagenesis must  
 246 be evaluated prior to interpreting the isotopic compositions. Following precipitation in  
 247 lake water bodies, carbonate minerals undergo a series of diagenetic alteration  
 248 processes during burial, influenced by temperature and pore fluids. These processes,  
 249 including dissolution and recrystallization, can lead to isotopic re-equilibration between  
 250 the minerals and fluids (Boever et al., 2017; Hillaire et al., 2021; Huntington and  
 251 Petersen, 2023). The extent of diagenetic alteration in lacustrine sediments can be  
 252 assessed using carbon and oxygen isotopes of carbonate minerals. During diagenesis,  
 253 carbon in pore fluids is typically scarce relative to the reservoir within carbonates,  
 254 resulting in a rock-buffered system for carbon. Conversely, oxygen is predominantly  
 255 sourced from pore fluids, creating a fluid-buffered system for oxygen. Consequently,  
 256 oxygen isotopic compositions are highly susceptible to alteration during diagenesis,  
 257 while carbon isotopic compositions generally remain more resistant to change (Wang,  
 258 2008; De Boever et al., 2017; Horacek et al., 2007; Ritter et al., 2017; Huntington and  
 259 Petersen, 2023). The correlation between carbonate  $\delta^{13}\text{C}_{\text{carb}}$  and  $\delta^{18}\text{O}$  values can  
 260 therefore be utilized to assess the degree of diagenetic influence on carbon isotopes. In  
 261 the present study, the  $\delta^{13}\text{C}_{\text{carb}}$  vs.  $\delta^{18}\text{O}$  plot (Figs. S2a) exhibits a weak correlation  
 262 ( $R^2=0.0132$ ), indicating that the  $\delta^{13}\text{C}_{\text{carb}}$  values retain primary depositional signals.  
 263 Furthermore, the Mn/Sr ratio, a sensitive indicator of post-depositional alteration (Hu  
 264 et al., 2023), show no significant correlation with either  $\delta^{13}\text{C}_{\text{carb}}$  ( $R^2=0.0012$ , Figs. S2b)  
 265 or  $\delta^{13}\text{C}_{\text{org}}$  ( $R^2=0.017$ , Figs. S2c). These results collectively suggest a negligible  
 266 influence of diagenesis on the measured carbon isotopic signatures.

267 Diagenetic and metamorphic processes can significantly alter the  $\delta^{15}\text{N}$  values of lake

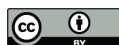

268 sediments. During diagenesis, microbial decomposition releases  $^{14}\text{N}$ -enriched  $\text{NH}_4^+$   
 269 into the pore water, resulting in  $^{15}\text{N}$  enrichment of residual organic matter and more  
 270 positive  $^{15}\text{N}$  values (Macko et al., 1987; Altabet, 1988; Lourey et al., 2003; Papineau et  
 271 al., 2009). Metamorphic processes similarly affect  $^{15}\text{N}$  through thermal degradation of  
 272 nitrogen-rich compounds, which preferentially releases  $^{14}\text{N}$ -enriched  $\text{NH}_3$  or  $\text{N}_2$ ,  
 273 leaving residual organic matter with elevated  $^{15}\text{N}$  values (Freudenthal et al., 2001;  
 274 Lehmann et al., 2002; Altabet, 2006; Robinson et al., 2012; Stüeken et al., 2016; Xia et  
 275 al., 2022). Correlative relationships among TOC, TN,  $\delta^{13}\text{C}_{\text{org}}$  and  $\delta^{15}\text{N}$  serve as key  
 276 indicators for assessing post-depositional alteration. In the present study, we observe  
 277 no significant correlations between  $\delta^{15}\text{N}$  and TOC (Figs. S2d), TN (Figs. S2e), C/N  
 278 (Figs. S2f), or  $\delta^{13}\text{C}_{\text{org}}$  (Figs. S2g). This demonstrates the  $\delta^{15}\text{N}$  values retain primary  
 279 depositional signals without diagenetic or metamorphic overprinting (Kipp et al., 2018;  
 280 Mettam et al., 2019).

281 Regarding terrigenous influences, lacustrine systems with substantial terrigenous  
 282 inputs typically exhibit  $\delta^{15}\text{N}$  values significantly lower than autochthonous algal  
 283 organic matter (+5‰ to +10‰), as terrigenous organic materials (e.g., plant debris, soil  
 284 humus) generally show lower  $\delta^{15}\text{N}$  values (-2‰ to +5‰) (Talbot, 2002; Shen et al.,  
 285 2006). While a  $\delta^{15}\text{N}_{\text{org}}$ -C/N correlation typically indicates terrestrial influence, its  
 286 absence in our dataset (Figs. S2f) confirms the  $\delta^{15}\text{N}_{\text{org}}$  values are unaffected by  
 287 terrigenous input.

## 288 5.2 Early Miocene positive carbon isotope excursion and methane release

289 The pronounced positive carbonate carbon isotope excursion recorded in the  
 290 Dingqinghu Formation is fundamentally controlled by the fractionation mechanisms of  
 291 lacustrine carbonate carbon isotopes. Consequently, investigating these fractionation  
 292 processes not only elucidates the drivers of extreme  $\delta^{13}\text{C}_{\text{carb}}$  excursions but also provide  
 293 critical insights into the paleolake's carbon cycle dynamics and ecosystem function  
 294 during this interval. Positive  $\delta^{13}\text{C}_{\text{carb}}$  excursions in lacustrine systems primarily arise  
 295 from isotope fractionation during three key processes: 1) Enhanced organic matter



296 production and burial, 2) Methane generation and release, and 3) Evaporative CO<sub>2</sub>,  
297 degassing in saline lakes (Michener and Lajtha, 2008; Thottathil et al., 2022). This  
298 study will systematically evaluate these mechanisms to determine their relative  
299 contributions to the observed  $\delta^{13}\text{C}_{\text{carb}}$  excursions.

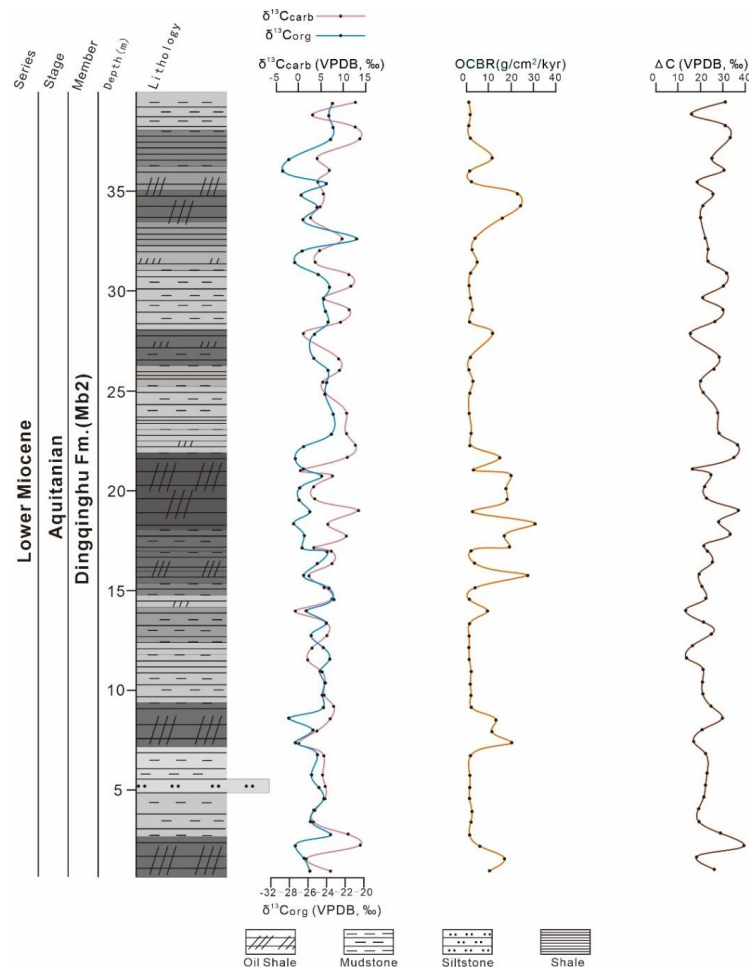

300  
301 Figure 3:  $\delta^{13}\text{C}_{\text{carb}}$  (Carbonate carbon isotope),  $\delta^{13}\text{C}_{\text{org}}$  (Organic Carbon Isotope), OCBR (Organic  
302 carbon burial rate) and  $\Delta^{13}\text{C}$  value curves of Dingqinghu Formation.

303 5.2.1 Enhanced organic carbon burial

304 In high-productivity lacustrine systems, variations in carbonate  $\delta^{13}\text{C}$  values are  
305 predominantly controlled by lacustrine productivity (Teranes and McKenzie,



1999; Teranes and Bernasconi, 2005; Zhu, 2013). This relationship arises from photosynthetic fractionation because aquatic plants preferentially assimilate  $^{12}\text{C}$  when utilizing  $\text{CO}_2$  and bicarbonate from dissolved inorganic carbon (DIC) pools. This process enriches residual DIC  $^{13}\text{C}$ , leading to subsequent  $^{13}\text{C}$  enrichment in precipitated carbonates (Schelske and Hodell, 1991; Neumann et al., 2002). Under high productivity where aquatic plants preferentially consume dissolved  $\text{CO}_2$ , the substantial  $\delta^{13}\text{C}$  difference between bicarbonate (relatively  $^{13}\text{C}$ -enriched) and aqueous  $\text{CO}_2$  (relatively  $^{13}\text{C}$ -depleted) further elevates  $\delta^{13}\text{C}$  values in both DIC and organic matter (Meyers, 1997; Hodell and Schelske, 1998; Leng and Marshall, 2004; Xu et al., 2006; Zhu et al., 2011). During lake eutrophication, algal blooms generate substantial organic matter while preferentially incorporating  $^{12}\text{C}$ . Resultant water column anoxia preserves algal biomass from decomposition, while high sedimentation rates enhance organic carbon burial. Carbonate minerals forming in these  $^{12}\text{C}$ -depleted waters consequently exhibit elevated  $\delta^{13}\text{C}$  values because sequestered  $^{12}\text{C}$  remains buried rather than returning to the water column (Müller and Suess, 1979; Calvert, 1987; Ingall et al., 1990; Tyson, 2001; Xu et al., 2004; Wang et al., 2015; Cartapanis et al., 2016; Megan et al., 2021; Wang et al., 2022; Tegler et al., 2024). For the Dingqinghu Formation, the  $\text{W(V)}/\text{W(V+Ni)}$  ratio (Fig. 4) indicates deposition under anoxic/reducing conditions. Corresponding sedimentary facies represent semi-deep and deep lacustrine environments with weak hydrodynamic conditions conducive to sediment preservation. This depositional setting therefore favored efficient organic accumulation and preservation.

Enhanced lacustrine productivity consistently drives both increased carbonate content and elevated  $\delta^{13}\text{C}$  values in organic matter (Meyers, 1997; Teranes and McKenzie, 1999; Neumann et al., 2002; Leng and Marshall, 2004; Teranes and Bernasconi, 2005; Xu et al., 2006; Lu et al., 2010). C/N values below 10 across most stratigraphic intervals (Fig. 2) indicate autochthonous productivity dominated by aquatic phytoplankton and algae, with negligible terrestrial input. This confirms TOC



334 serves as a reliable proxy for lacustrine productivity under limited external influences  
 335 (Meyers, 1997; Zhu et al., 2013). Critically, intervals displaying positive  $\delta^{13}\text{C}_{\text{carb}}$   
 336 excursions exhibit extremely low TOC content (average < 1%), indicating depressed  
 337 productivity. This inverse relationship demonstrates lacustrine productivity cannot  
 338 explain the observed  $\delta^{13}\text{C}_{\text{carb}}$  excursions. Further supporting this interpretation, high-  
 339 productivity systems typically yield elevated  $\delta^{15}\text{N}$  values through two mechanisms.  
 340 Phytoplankton preferentially assimilate  $^{14}\text{N}$ , enriching dissolved inorganic nitrogen  
 341 pools in  $^{15}\text{N}$ . Enhanced denitrification under anoxic conditions further amplifies  $\delta^{15}\text{N}$   
 342 increase in residual nitrogen (Sigman D, 2009). Our data reveal an inverse pattern  
 343 where positive  $\delta^{13}\text{C}_{\text{carb}}$  excursions systematically coincide with negative  $\delta^{15}\text{N}$  shift (Fig.  
 344 2), demonstrating that the positive  $\delta^{13}\text{C}_{\text{carb}}$  excursion was not caused by enhanced  
 345 productivity.

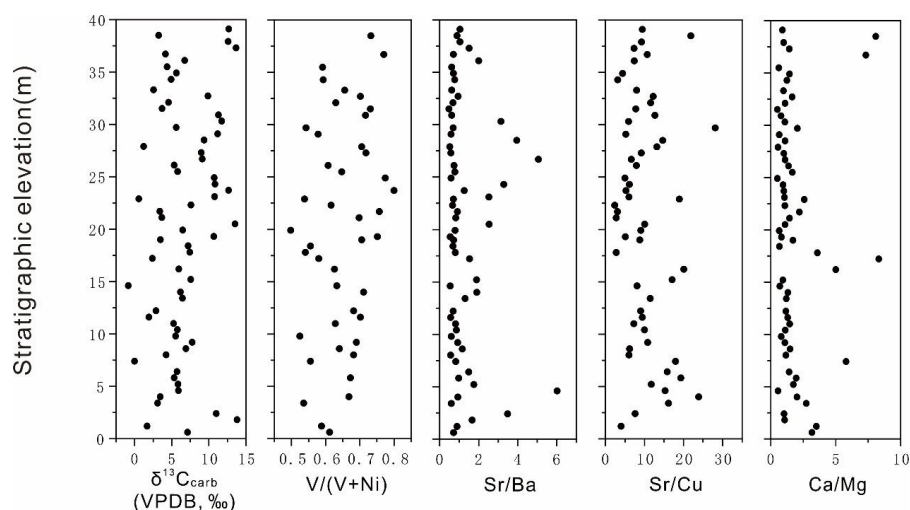

346  
 347 Figure 4:  $\delta^{13}\text{C}_{\text{carb}}$  (Carbonate carbon isotope),  $\text{V}/(\text{V}+\text{Ni})$ ,  $\text{Sr}/\text{Cu}$ ,  $\text{Sr}/\text{Ba}$  and  $\text{Ca}/\text{Mg}$  data in Dingqinghu  
 348 Formation of lunpola basin.

349 U-Pb dating and stratigraphic thickness measurements from the Lunpori section  
 350 indicate a sedimentation rate (SR) of  $\sim 107$  m/Ma for the study interval of the  
 351 Dingqinghu Formation (Mao et al., 2019; Xie et al., 2025). The organic carbon burial  
 352 rate (OCBR) was calculated using the Eq. (1) (Shen et al., 2015):



$$OCBR (mg/cm^2/kyr) = SR (m/Myr) \times TOC (\%) \times \rho (g/cm^3), \quad (1)$$

Assuming a bulk rock density ( $\rho$ ) of  $2.5 g/cm^3$ , OCBR values for the Dingqinghu Formation in the Lunpori section were derived through unit conversion (summarized in S Table 2). Fig. 3 reveals asynchronous trends between OCBR and the positive  $\delta^{13}C_{carb}$  excursion coupled with extremely low correlation coefficient. This strongly suggests that variations in organic carbon burial rate were not the primary driver of the  $\delta^{13}C_{carb}$  enrichment observed in the Dingqinghu Formation during this interval.

## 5.2.2 Evaporation

Strong evaporation in lakes can drive extreme positive carbonate carbon isotope values. This process promotes lake degassing, releasing  $CO_2$  enriched in  $^{12}C$  into the atmosphere. The preferential loss of  $^{12}C$  depletes the DIC pool in light carbon, thereby increasing  $\delta^{13}C_{carb}$  (Li and Ku, 1997; Lamb et al., 2007; Zhu et al., 2013; Boscolo-Galazzo et al., 2021). This mechanism is further supported by studies linking evaporative salinity increase to reduced  $CO_2$  solubility and kinetic isotope fractionation during  $CO_2$  efflux (Stiller, 1985). Consequently, arid climates with intense evaporation typically elevate lake salinity and lower lake levels. Palynological data from the Dingqinghu Formation (Xie et al., 2025) reveal alternating dry (e.g., 21.3 Ma, 19.6 Ma) and humid phases (e.g., 20.4 Ma, 20.1 Ma) between 21.4 Ma and 19.4 Ma. At 20.6 Ma, pollen assemblages (*Picea*, 50.1%; *Pinus*, 22.2%; *Abies*, 4.9%; and *Fagaceae*, 5.2%) indicate warm-humid conditions, consistent with magnetostratigraphic cyclostratigraphic evidence of dry-to-wet cycles (Su et al., 2022). Sr/Cu ratios (Fig. 4) independently confirm warm-arid to warm-humid cyclicity during deposition of the Dingqinghu Formation. Crucially, humid phases reduce evaporation, limiting the  $^{12}C$ -enriched  $CO_2$ , and thus diminishing  $^{13}C$  enrichment in the DIC pool. In closed basins like the Lunpola paleolake, evaporation intensity correlates strongly with salinity (Mor et al., 2018; Han et al., 2022), making Ca/Mg ratios an effective salinity proxy (McCormack et al., 2019; Gravina et al., 2022). However, correlation an





381 analyses of Ca/Mg and Sr/Ba versus  $\delta^{13}\text{C}_{\text{carb}}$  show no significant relationship bet  
 382 ween salinity changes and  $\delta^{13}\text{C}_{\text{carb}}$  excursion during the Dingqinghu Formation  
 383 deposition. This lack of correlation demonstrates that salinity variations did not  
 384 primarily control  $\delta^{13}\text{C}_{\text{carb}}$  trend. Integrated assessment of climate proxies, salinit  
 385 y indicators, and carbon isotopes indicate that while evaporation may contribute  
 386 secondarily to  $\delta^{13}\text{C}_{\text{carb}}$  enrichment, it was not the principal driver of the obser  
 387 ved positive excursion.

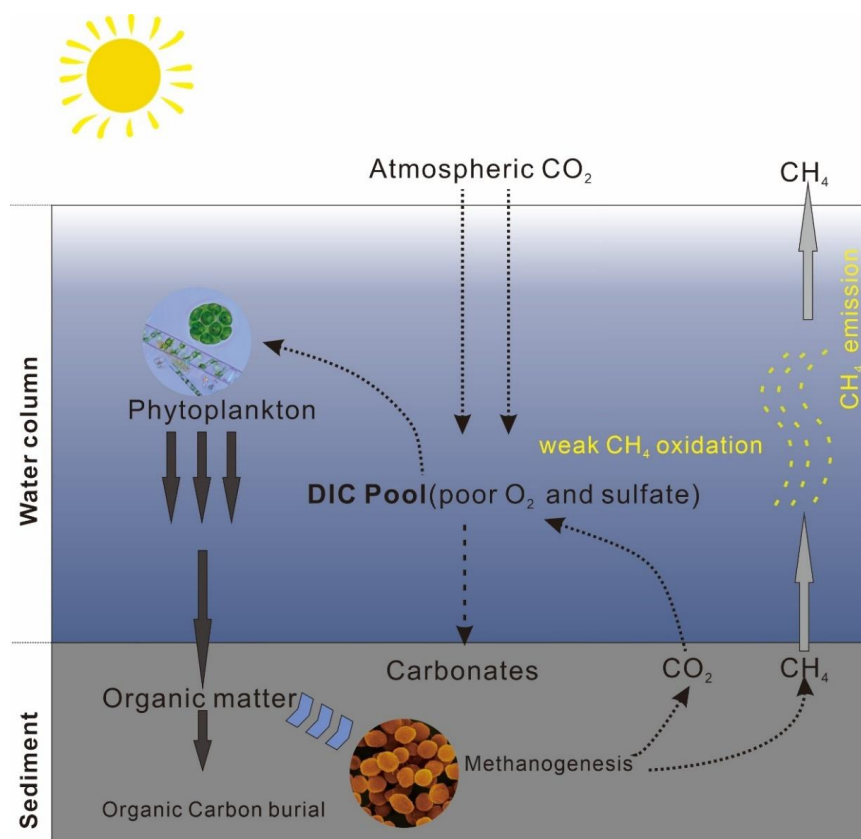

388  
 389 Figure 5: Schematic diagram of the carbon cycling pathway for methane release in Dingqing Lake.  
 390 Biogenic methane is generated by methanogens in the anoxic sediments, and the water column is under  
 391 reducing conditions, lacking electron acceptors such as sulfate and iron ions. The methane directly  
 392 discharges into the atmosphere.



393 5.2.3 Methane release as the driver of Early Miocene positive  $\delta^{13}\text{C}_{\text{carb}}$  excursion

394 Methane generation produces significant quantities of  $\text{CH}_4$  highly enriched in  $^{12}\text{C}$

395 alongside  $\text{CO}_2$  enriched in  $^{13}\text{C}$ . The subsequent escape of  $^{12}\text{C}$ -enriched  $\text{CH}_4$  and the

396 incorporation of  $^{13}\text{C}$ -enriched  $\text{CO}_2$  into the DIC pool drive  $\delta^{13}\text{C}_{\text{carb}}$  enrichment in DIC-

397 derived carbonates. Based on integrated geochemical evidence, the extreme positive

398 excursion of  $\delta^{13}\text{C}_{\text{carb}}$  in the Dingqinghu Formation likely resulted from substantial

399 kinetic isotope fractionation during methanogenesis. This process facilitated the

400 preferential removal of  $^{12}\text{C}$  as  $\text{CH}_4$ , leaving the DIC pool enriched in  $\delta^{13}\text{C}_{\text{carb}}$ . Similar

401 mechanisms are documented in organic-rich lacustrine systems. Examples include Tilo

402 and Lake Bosumtwi, where methanogenesis elevated carbonate  $\delta^{13}\text{C}$  values to

403 approximately +12‰ (Talbot and Kelts, 1986; Lamb et al., 2007; Rosqvist et al., 2007).

404 Methanogenesis in Lake Apopka generated pore water  $\delta^{13}\text{C}$  values up to +26.4‰ (Gu

405 et al., 2004), while Lake Dziani Dzaha recorded average carbonate  $\delta^{13}\text{C}$  values of +16.2

406  $\pm 1.1$ ‰ (Cadeau et al., 2020). In Lake Caohai, it increased lacustrine carbonate  $\delta^{13}\text{C}$  to

407 +20.94‰ (Zhu et al., 2013).

408 Unlike marine sediments dominated by  $\text{CO}_2$ -reducing methanogenesis (Eq. (R1)),

409 the organic-rich, reducing Lunpola paleolake during Dingqinghu Formation deposition

410 provided an optimal environment for bacterial fermentation. Here acetoclastic

411 methanogenesis (Eq. (R2)) prevailed as the primary methane production pathway

412 (Whitticar et al., 1986). Critically, methane fate diverges significantly between marine

413 and lacustrine systems. In marine setting, methane is largely consumed at the Sulfate-

414 Methane Transition Zone (SMTZ) via syntrophy between sulfate-reducing bacteria and

415 anaerobic methanotrophic archaea, with additional aerobic oxidation minimizing

416 atmospheric release (Boetius et al., 2000; Deutzmann and Schink, 2011; Mostovaya et

417 al., 2022). Conversely, thinner oxic layers in lakes permit substantial methane bypass

418 of oxidation, leading to significant atmospheric emissions (Sun, 2024).

419  $\text{CO}_2 + 4\text{H}_2 \rightarrow \text{CH}_4 + 2\text{H}_2\text{O}$ , (R1)

420  $\text{CH}_3\text{COOH} \rightarrow \text{CH}_4 + \text{CO}_2$ , (R2)



421 The carbon isotope fractionation between carbonate and organic matter  
 422 ( $\Delta^{13}\text{C} = \delta^{13}\text{C}_{\text{carb}} - \delta^{13}\text{C}_{\text{org}}$ ) serves as a valuable proxy for assessing microbial  
 423 contributions to sedimentary organic carbon. As established in prior studies (Hayes et  
 424 al., 1999; Teranes and Bernasconi, 2005; Zhu et al., 2013),  $\Delta^{13}\text{C}$  approximates  $\epsilon\text{TOC}$ ,  
 425 the isotopic fractionation factor during organic matter synthesis. Significantly,  $\epsilon\text{TOC}$   
 426 value  $>32\text{‰}$  indicates a dominant bacterial contribution to sedimentary organic matter,  
 427 while values between  $28\text{‰}$  and  $32\text{‰}$  suggest a mixed phytoplankton-bacterial source  
 428 (Hayes et al., 1999; Teranes and Bernasconi, 2005; Zhu et al., 2013). Analysis of the  
 429 Dingqinghu Formation reveals that intervals characterized by enriched  $\delta\text{C}_{\text{carb}}$  values  
 430 predominantly exhibit  $\Delta^{13}\text{C}$  values exceeding  $32\text{‰}$  (Fig. 3). This pronounced  
 431 fractionation strongly implicates bacterial fermentation and decomposition as the  
 432 primary processes driving carbon isotope dynamics during these stages. Concurrently  
 433 depleted TOC values align with the expected signature of intense bacterial organic  
 434 matter remineralization, further supporting the inference of methane release associated  
 435 with these microbial processes.

### 436 5.3 Lacustrine methane emissions response to Early Miocene warming

437 The Early Miocene was a pivotal period for climatic change in Asia, primarily driven  
 438 by the extensive uplift of the Tibetan Plateau and the retreat of the Paratethys Ocean.  
 439 These processes intensified the Asian monsoon system (Ramstein et al., 1997; Liu and  
 440 Yin, 2002; Zhang et al., 2007; Boos & Kuang, 2010; Clift & Webb, 2019; Spicer et al.,  
 441 2021), altering atmospheric circulation and thermal gradients, which in turn led to  
 442 significant climatic differentiation across the Tibetan Plateau and adjacent areas. The  
 443 plateau itself is influenced by both the Indian monsoon and continental monsoon  
 444 systems, resulting in a range of climate regimes from warm and humid to dry and cold  
 445 (Kutzbach et al., 1993; Guo et al., 2008; Shukla et al., 2014).

446 Studies by Deng et al. (2019) indicate that during the Miocene, the Indian monsoon  
 447 dominated the Lunpola Basin, supplying ample moisture and warmth to the region. This  
 448 interpretation is supported by the presence of subtropical fish fossils in the stratigraphic



449 record, along with previously documented mammalian fossils, pollen, and spores (Deng  
450 et al., 2012; Sun et al., 2014; Jia et al., 2015; Jiang et al., 2018). The monsoon-driven  
451 warm and humid conditions fostered high productivity of organic matter within the lake  
452 ecosystem, while also promoting the decomposition of organic material by  
453 methanogens, leading to substantial methane production (Deng et al., 2019; Su et al.,  
454 2019).

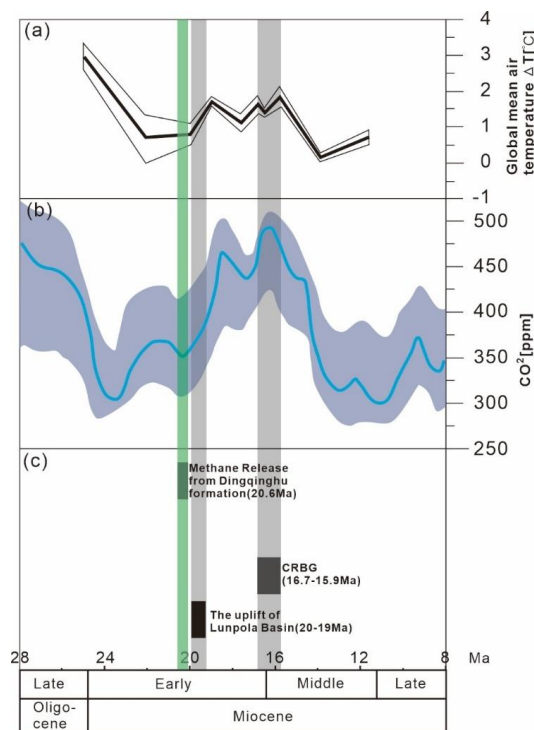

455  
456 Figure 6:(a)The difference between the global average temperature and today's temperature  
457 simulation(Kürschner et al.,2008); (b) Atmospheric CO<sub>2</sub> estimates (symbols) and 500-kyr mean  
458 statistical reconstructions (95% credible intervals in dark-blue shading, respectively) (Cenozoic CO<sub>2</sub>  
459 Proxy Integration Project (CenCO<sub>2</sub>PIP) Consortium,2023); (c) Main geological events of the Miocene,  
460 From right to left in order: 1) Methane release from Dingqinghu formation (this study) 2) The uplift of  
461 Lunpola basin (Li et al.,2024) 3) CRBG: Columbia River Basalt Group, the largest terrestrial volcanic  
462 event in North America(Kasbohm et al.,2018).

463 Geochemical records from the Dingqinghu Formation in the Lunpola Basin reveal



464 severely deficient sulfur content (as indicated by whole-rock S data; see Table S2) along  
 465 with exceptionally low pyrite abundance, suggesting that sulfate concentrations in the  
 466 paleo-lake were minimal during deposition. This sulfate-limited environment likely  
 467 suppressed sulfate-driven anaerobic oxidation of methane (SD-AOM). In addition, a  
 468 reduced oxidation zone further decreased CH<sub>4</sub> consumption, resulting in significant  
 469 methane efflux into the atmosphere (Fig. 5; Taylor and Macquaker, 2011; Rickard, 2021;  
 470 Lin et al., 2023).

471 As a potent greenhouse gas, with a global warming potential 28–34 times that of CO<sub>2</sub>  
 472 over a 100-year period, methane release from lakes could have contributed substantially  
 473 to global warming (Forster et al., 2008; Sun et al., 2020). The only known Large  
 474 Igneous Province (LIP) eruption during the Miocene was the Columbia River Basalt  
 475 Group, which occurred between approximately 16.7 and 15.9 Ma. This event  
 476 significantly increased global temperatures and atmospheric CO<sub>2</sub> levels (Fig. 6c;  
 477 Kasbohm et al., 2018). However, according to Li et al. (2024), major uplift of the  
 478 Lunpola Basin occurred between 20 and 19 Ma, after the methane release event  
 479 recorded in the Dingqinghu Formation. This temporal discordance indicates that  
 480 methane release was not triggered by tectonic uplift (Fig. 6). Furthermore, no  
 481 contemporary volcanic activity was associated with this methane emission, suggesting  
 482 that climatic and lacustrine thermal conditions were the primary controls.

483 Global temperature reconstructions for the Early Miocene indicate a warming trend,  
 484 accompanied by methane release and rising atmospheric CO<sub>2</sub> levels, which suggests a  
 485 methane-driven warming event (Fig. 6; Kürschner et al., 2008). In the absence of large  
 486 igneous province volcanism, this increase in CO<sub>2</sub> can likely attributed to two main  
 487 processes: (1) the atmospheric oxidation of methane released from the lacustrine  
 488 deposits, such as those of the Dingqinghu Formation identified in the present study, and  
 489 (2) additional CO<sub>2</sub> emissions from climate feedback mechanisms amplified by the  
 490 initial greenhouse warming (Fig. 6; Cenozoic CO<sub>2</sub> Proxy Integration Project  
 491 (CenCO<sub>2</sub>PIP) Consortium, 2023). Consequently, methane release from the Tibetan

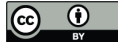

492 Plateau may have played an important role in Early Miocene global warming and the  
 493 concurrent rise in atmospheric CO<sub>2</sub> levels.

494 As discussed in the preceding sections, a positive feedback mechanism exists  
 495 between methane release in the Dingqinghu Formation and global climate warming  
 496 during the Miocene. As temperature rose, lake stratification and anoxia intensified,  
 497 stimulating microbial methanogenesis and methane ebullition. This released methane  
 498 was subsequently oxidized to CO<sub>2</sub>, further amplifying the greenhouse effect and  
 499 reinforcing the warming cycle. The Dingqinghu Formation represents a deep-water,  
 500 anoxic, organic-rich, and semi-restricted lacustrine system with limited external DIC  
 501 input. To quantify methane ebullition during intervals of pronounced positive carbon  
 502 isotope excursions in lacustrine sediments, we applied a closed-system Rayleigh  
 503 fractionation model (Eq. (2)). This method enables estimation of methane emission  
 504 rates and evaluation of their contribution to atmospheric CO<sub>2</sub>, offering direct numerical  
 505 support for the proposed positive feedback mechanism.

506 The Rayleigh distillation equation is expressed as (Höhener and Atteia, 2014; Miller  
 507 et al., 2018; Li et al., 2024):

$$508 \quad \delta^{13}C_{carb} = \delta^{13}C_{initial} + \varepsilon \cdot \ln(f), \quad (2)$$

509 where  $\delta^{13}C_{carb}$  is the measured carbonate carbon isotope composition (‰ VPDB),  
 510  $\delta^{13}C_{initial}$  is the initial dissolved inorganic carbon isotope composition (‰, typical  
 511 lacustrine background) (Lengs and Marshall, 2004);  $\varepsilon$  is the fractionation factor (‰, typical  
 512 for acetoclastic methanogenesis) (Penning et al., 2006; Valentine et al., 2004; Meister et  
 513 al., 2019); and  $f$  is the fraction of residual DIC.

514 The fraction of methane lost from the system is then:

$$515 \quad 1 - f = 1 - \exp\left(\frac{\delta^{13}C_{carb} + 2}{-20}\right), \quad (3)$$

516 Methane ebullition flux (g CH<sub>4</sub> m<sup>-2</sup> kyr<sup>-1</sup>) is calculated as:

$$517 \quad F_{CH_4} = (1 - f) \times OCBR \times \frac{16}{12}, \quad (4)$$

518 where OCBR is the measured organic carbon burial rate (g C cm<sup>-2</sup> kyr<sup>-1</sup>). Fluxes are  
 519 converted to g CH<sub>4</sub> m<sup>-2</sup> yr<sup>-1</sup> by division by 1000. The full 62-sample dataset with CH<sub>4</sub>



520 flux is provided in Supplementary Table S4.

521 Our calculations show that the paleo-Dingqinghu Lake maintained an average  
 522 methane flux of  $34.5 \text{ g CH}_4 \text{ m}^{-2} \text{ yr}^{-1}$  (peaking at  $151.2 \text{ g CH}_4 \text{ m}^{-2} \text{ yr}^{-1}$ ). After accounting  
 523 for 30–50% methane loss during atmospheric escape and oxidation, these ebullition  
 524 events contributed an estimated 3.9–6.6 ppm of atmospheric  $\text{CO}_2$  throughout the  
 525 studied depositional interval. These values provide quantitative evidence that Miocene  
 526 global warming enhanced lake stratification and anoxia, accelerating organic matter  
 527 decomposition and methane release. The subsequent oxidation of this methane supplied  
 528 additional  $\text{CO}_2$  to the atmosphere, further strengthening greenhouse conditions and  
 529 closing a powerful feedback loop. Therefore, paleo-Dingqinghu Lake serves as a clear  
 530 example of how continental lacustrine systems on the Tibetan Plateau acted as  
 531 significant amplifiers of global warming during past greenhouse climates, even though  
 532 their role had been previously underestimated.

## 533 **6 Conclusions**

534 Our finds establish that the pronounced positive carbonate carbon isotope excursion  
 535 ( $\delta^{13}\text{C}_{\text{carb}}$  up to +13.79‰) recorded in the Dingqinghu Formation, Lunpola Basin,  
 536 originated primarily from large-scale methanogenesis and subsequent methane release.  
 537 Favorable paleoclimate and tectonic conditions promoted organic matter accumulation  
 538 and methanogenesis, while low sulfate concentrations limited anaerobic methane  
 539 oxidation, facilitating substantial methane escape to the atmosphere. The observed  
 540 coupling between this methane release and Early Miocene global atmospheric  $p\text{CO}_2$   
 541 and temperature rises implicates that Tibetan Plateau methane emissions as a potentially  
 542 important contributor to in Early Miocene global warming and the coeval increase in  
 543 atmospheric  $\text{CO}_2$ .

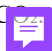

## 544 **Data availability**

545 All raw data can be provided by the corresponding authors upon request.



546 **Author contributions**

547 CY, XF, and HW: study design, data production, analysis, data interpretation, writing.  
 548 CY, JD, YW, and TW: sample handling. CY: stable isotope and organic carbon content  
 549 experiment. CY, XF, and SZ: calculation of methane flux.

550 **Competing interests**

551 The contact author has declared that none of the authors has any competing interests.

552 **Acknowledgements**

553 We thank Ahmed Mansour for providing comprehensive and valuable suggestions.

554 **Financial support**

555 This research was supported funding from the National Natural Science Foundation of  
 556 China (grant numbers 42241203, 42241202, w2433105) and Science and Technology  
 557 Cooperation Project of the CNPC-SWPU Innovation Alliance (2020Cx0101).

558 **Reference**

559 Altabet, M. A.: Variations in nitrogen isotopic composition between sinking and  
 560 suspended particles: Implications for nitrogen cycling and particle transforma  
 561 tion in the open ocean, Deep-Sea Res. Part I-Oceanogr. Res. Pap., 35: 535-5  
 562 54, [https://doi.org/10.1016/0198-0149\(88\)90130-6](https://doi.org/10.1016/0198-0149(88)90130-6), 1988.

563 Altabet, M. A.: Isotopic tracers of the marine nitrogen cycle: present and past, i  
 564 n: Marine organic matter: biomarkers, isotopes and DNA, edited by: Volkma  
 565 n, J.K., Springer, Berlin, Heidelberg, 251-293, [https://doi.org/10.1007/698\\_2\\_0](https://doi.org/10.1007/698_2_0)  
 566 08, 2006

567 Bastviken, D., Cole, J., Pace, M., and Tranvik, L.: Methane emissions from lak  
 568 es: Dependence of lake characteristics, two regional assessments, and a globa





569 l estimate, Glob. Biogeochem. Cycle., 18, GB4009, <https://doi.org/10.1029/2000>  
 570 [4GB002238](https://doi.org/10.1029/2000GB002238), 2004.

571 Boetius, A., Ravensschlag, K., Schubert, C. J., Rickert, D., Widdel, F., Gieseke,  
 572 A., Amann, R., Jørgensen, B. B., Witte, U., and Pfannkuche, O.: A marine  
 573 microbial consortium apparently mediating anaerobic oxidation of methane, N  
 574 ature, 407, 623-626, <https://doi.org/10.1038/35036572>, 2000.

575 Boos, W. R. and Kuang, Z.: Dominant control of the South Asian monsoon by  
 576 orographic insulation versus plateau heating, Nature, 463: 218-222, [https://do](https://doi.org/10.1038/nature08707)  
 577 [i.org/10.1038/nature08707](https://doi.org/10.1038/nature08707), 2010.

578 Boscolo-Galazzo, F., Crichton, K. A., Ridgwell, A., Mawbey, E. M., Wade, B.  
 579 S., and Pearson, P. N.: Temperature controls carbon cycling and biological e  
 580 volution in the ocean twilight zone. Science, 371, 1148-1152, [https://doi.org/1](https://doi.org/10.1126/science.abb6643)  
 581 [0.1126/science.abb6643](https://doi.org/10.1126/science.abb6643), 2021.

582 Cadeau, P., Jézéquel, D., Leboulanger, C., Fouilland, E., Le Floc'h, E., Chadute  
 583 au, C., Milesi, V., Guélard, J., Sarazin, G., Katz, A., d'Amore, S., Bernard,  
 584 C., and Ader, M.: Carbon isotope evidence for large methane emissions to t  
 585 he proterozoic atmosphere, Sci Rep., 10, 18186, [https://doi.org/10.1038/s41598](https://doi.org/10.1038/s41598-020-75100-x)  
 586 [-020-75100-x](https://doi.org/10.1038/s41598-020-75100-x), 2020.

587 Calvert, S. E.: Oceanographic controls on the accumulation of organic matter i  
 588 n marine sediments, Geol. Soc. London. Spec. Publ., 26, 137–151, [https://doi.](https://doi.org/10.1144/GSL.SP.1987.026.01.08)  
 589 [org/10.1144/GSL.SP.1987.026.01.08](https://doi.org/10.1144/GSL.SP.1987.026.01.08), 1987.

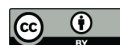

590 Cartapanis, O., Bianchi, D., Jaccard, S. L., and Galbraith, E. D.: Global pulses  
 591 of organic carbon burial in deep-sea sediments during glacial maxima, Nat.  
 592 Commun., 7, 10796, <https://doi.org/10.1038/ncomms10796>, 2016.

593 Cenozoic CO<sub>2</sub> Proxy Integration Project (CenCO<sub>2</sub>PIP) Consortium: Toward a C  
 594 enozoic history of atmospheric CO<sub>2</sub>, Science, 382, eadi5177, [https://doi.org/1](https://doi.org/10.1126/science.adi5177)  
 595 [0.1126/science.adi5177](https://doi.org/10.1126/science.adi5177), 2023.

596 Clift, P. D. and Webb, A. A. G.: A history of the Asian monsoon and its inte  
 597 ractions with solid Earth tectonics in Cenozoic South Asia, Geol. Soc. Spec.  
 598 Publ., 483, 631-652, <https://doi.org/10.1144/SP483.1>, 2019.

599 De Boever, E., Brasier, A. T., Foubert, A., and Kele, S.: What do we really k  
 600 now about early diagenesis of non-marine carbonates? Sediment. Geol., 361,  
 601 25–51, <https://doi.org/10.1016/j.sedgeo.2017.09.011>, 2017.

602 Dean, J. F., Middelburg, J. J., Röckmann, T., Aerts, R., Blauw, L. G., Egger,  
 603 M., Jetten, M. S. M., de Jong, A. E. E., Meisel, O. H., Rasigraf, O., Slomp,  
 604 C. P., In'T Zandt, M. H., and Dolman, A. J.: Methane feedbacks to the glo  
 605 bal climate system in a warmer world, Rev. Geophys., 56, 207-250, [https://d](https://doi.org/10.1002/2017RG000559)  
 606 [oi.org/10.1002/2017RG000559](https://doi.org/10.1002/2017RG000559), 2018.

607 DelSontro, T., Boutet, L., St-Pierre, A., Del Giorgio, P. A., and Prairie, Y. T.:  
 608 Methane ebullition and diffusion from northern ponds and lakes regulated by  
 609 the interaction between temperature and system productivity, Limnol. Oceano  
 610 gr., 61: S62-S77, <https://doi.org/10.1002/lno.10335>, 2016.



611 Deng, T., Wang, S., Xie, G., Li, Q., Hou, S., and Sun, B.: A mammalian fossil  
 612 from the Dingqing Formation in the Lunpola Basin, northern Tibet, and its  
 613 relevance to age and paleo-altimetry, *Chin. Sci. Bull.*, 57, 261-269, <https://doi.org/10.1007/s11434-011-4773-8>, 2012.

615 Deng, T., Wang, X., Wu, F., Wang, Y., Li, Q., Wang, S., and Hou, S.: Implications  
 616 of vertebrate fossils for paleo-elevations of the Tibetan Plateau, *Glob. Planet. Change*, 174, 58-69, <https://doi.org/10.1016/j.gloplacha.2019.01.005>, 2019.

619 Deutzmann, J. S., and Schink, B.: Anaerobic oxidation of methane in sediments  
 620 of Lake Constance, an oligotrophic freshwater lake, *Appl. Environ. Microbiol.*, 77, 4429-4436, <https://doi.org/10.1128/AEM.00340-11>, 2011.

622 Encinas Fernández, J., Peeters, F., and Hofmann, H.: Importance of the autumn  
 623 overturn and anoxic conditions in the hypolimnion for the annual methane  
 624 emissions from a temperate lake, *Environ. Sci. Technol.*, 48, 7297-7304, <http://doi.org/10.1021/es4056164>, 2014.

626 Fang, X., Dupont-Nivet, G., Wang, C., Song, C., Meng, Q., Zhang, W., Nie, J.,  
 627 Zhang, T., Mao, Z., and Chen, Y.: Revised chronology of central Tibet uplift  
 628 (Lunpola Basin), *Sci. Adv.*, 6, eaba7298, <http://doi.org/10.1126/sciadv.aba7298>, 2020.

630 Forster, P., Ramaswamy, V., Artaxo, P., Berntsen, T., Betts, R., Fahey, D., Haywood, J., Lean, J., Lowe, D., Myhre, G., Nganga, J., Prinn, R., Raga, G., S



chulz, M., and Van Dorland, R.: Changes in atmospheric constituents and in  
 radiative forcing, in: *Climate Change 2007: The Physical Science Basis*, edited  
 by: Solomon, S., Qin, D., Manning, M., Marquis, M., Averyet, K., and M  
 elinda M. B., Cambridge University Press, Cambridge, UK, 129–134, ISBN  
 9780521705967, 2008.

Freudenthal, T., Wagner, T., Wenzhöfer, F., Zabel, M., and Wefer, G.: Early dia  
 genesis of organic matter from sediments of the eastern subtropical Atlantic:  
 evidence from stable nitrogen and carbon isotopes, *Geochim. Cosmochim. Ac  
 ta*, 65, 1795–1808, [https://doi.org/10.1016/S0016-7037\(01\)00554-3](https://doi.org/10.1016/S0016-7037(01)00554-3), 2001.

Fu, X., Wang, J., Tan, F., Feng, X., Wang, D., and Song, C.: Geochemistry of  
 terrestrial oil shale from the Lunpola area, northern Tibet, China, *Int. J. Coal  
 Geol.*, 102, 1–11, <https://doi.org/10.1016/j.coal.2012.08.005>, 2012.

Fu, X., Wang, J., Chen, W., Feng, X., Wang, D., Song, C., and Zeng, S.: Org  
 anic accumulation in lacustrine rift basin: constraints from mineralogical and  
 multiple geochemical proxies, *Int. J. Earth Sci.*, 104, 495–511, [https://doi.org/  
 10.1007/s00531-014-1089-3](https://doi.org/10.1007/s00531-014-1089-3), 2015.

Fu, X., Wang, J., Wen, H., Wang, Z., Zeng, S., Song, C., Wang, D., and Nie,  
 Y.: Carbon-isotope record and paleoceanographic changes prior to the OAE  
 1a in the Eastern Tethys: Implication for the accumulation of organic-rich se  
 diments, *Mar. Pet. Geol.*, 113, 104049, [https://doi.org/10.1016/j.marpetgeo.201  
 9.104049](https://doi.org/10.1016/j.marpetgeo.2019.104049), 2020.



653 Gravina, P., Ludovisi, A., Moroni, B., Vivani, R., Selvaggi, R., Petroselli, C., a  
 654 nd Cappelletti, D.: Geochemical proxies and mineralogical fingerprints of sed  
 655 imentary processes in a closed shallow lake basin since 1850, *Aquat. Geoche*  
 656 *m.*, 28, 43-62, <https://doi.org/10.1007/s10498-022-09403-y>, 2022.

657 Gu, B., Schelske, C. L., and Hodell, D. A.: Extreme  $^{13}\text{C}$  enrichments in a sha  
 658 llow hypereutrophic lake: implications for carbon cycling, *Limnol. Oceanogr.*,  
 659 49, 1152-1159, <https://doi.org/10.4319/lo.2004.49.4.1152>, 2004.

660 Guo, Z., Sun, B., Zhang, Z., Peng, S., Xiao, G., Ge, J., Hao, Q., Qiao, Y., Li  
 661 ang, M., Liu, J., Yin, Q., and Wei, J.: A major reorganization of Asian clim  
 662 ate by the early Miocene, *Clim. Past*, 4, 153–174, [https://doi.org/10.5194/cp-4](https://doi.org/10.5194/cp-4-153-2008)  
 663 [-153-2008](https://doi.org/10.5194/cp-4-153-2008), 2008.

664 Gutjahr, M., Ridgwell, A., Sexton, P. F., Anagnostou, E., Pearson, P. N., Pälik  
 665 e, H., Norris, R. D., Thomas, E., and Foster, G. L.: Very large release of m  
 666 ostly volcanic carbon during the Palaeocene–Eocene Thermal Maximum, *Natu*  
 667 *re*, 548, 573-577, <https://doi.org/10.1038/nature23646>, 2017.

668 Han, L., Li, Y., Zou, Y., Gao, X., Gu, Y., and Wang, L.: Relationship between  
 669 lake salinity and the climatic gradient in northeastern China and its implicat  
 670 ions for studying climate change, *Sci. Total Environ.*, 805: 150403, [https://do](https://doi.org/10.1016/j.scitotenv.2021.150403)  
 671 [i.org/10.1016/j.scitotenv.2021.150403](https://doi.org/10.1016/j.scitotenv.2021.150403), 2022.

672 Hayes, J. M., Strauss, H., and Kaufman, A. J.: The abundance of  $^{13}\text{C}$  in mari  
 673 ne organic matter and isotopic fractionation in the global biogeochemical cyc



674 le of carbon during the past 800 Ma, *Chem. Geol.*, 161, 103-125, [https://doi.org/10.1016/S0009-2541\(99\)00083-2](https://doi.org/10.1016/S0009-2541(99)00083-2), 1999.

675

676 Hillaire-Marcel, C., Kim, S., Landais, A., Ghosh, P., Assonov, S., Lécuyer, C.,

677 Blanchard, M., Meijer, H. A. J., and Steen-Larsen, H. C.: A stable isotope toolbox for water and inorganic carbon cycle studies, *Nat. Rev. Earth. Env.*,

678

679 2, 699–719, <http://doi.org/10.1038/s43017-021-00209-0>, 2021.

680 Hodell, D. A. and Schelske, C. L.: Production, sedimentation, and isotopic composition of organic matter in Lake Ontario, *Limnol. Oceanogr.*, 43, 200-214,

681

682 <https://doi.org/10.4319/lo.1998.43.2.0200>, 1998.

683 Höhener, P. and Atteia, O.: Rayleigh equation for evolution of stable isotope ratios in contaminant decay chains, *Geochim. Cosmochim. Acta*, 126, 70-77, <https://doi.org/10.1016/j.gca.2013.10.036>, 2013.

684

685

686 Hollander, D. J. and Smith, M. A.: Microbially mediated carbon cycling as a control on the  $\delta^{13}\text{C}$  of sedimentary carbon in eutrophic Lake Mendota (USA): new models for interpreting isotopic excursions in the sedimentary record, *Geochim. Cosmochim. Acta*, 65, 4321-4337, [https://doi.org/10.1016/S0016-7037\(00\)00506-8](https://doi.org/10.1016/S0016-7037(00)00506-8), 2001.

687

688

689

690

691 Horacek M., Brandner R., and Abart R.: Carbon isotope record of the P/T boundary and the Lower Triassic in the Southern Alps: evidence for rapid changes in storage of organic carbon, *Paleogeogr. Paleoclimatol. Paleoecol.*, 252, 347–354, <https://doi.org/10.1016/j.palaeo.2006.11.049>, 2007.

692

693

694



695 Hu, D., Li, D., Zhou, L., Sun, L., and Xu, Y.: Diagenetic effects on strontium  
 696 isotope ( $^{87}\text{Sr}/^{86}\text{Sr}$ ) and elemental (Sr, Mn, and Fe) signatures of Late Ordo  
 697 vician carbonates, J. Univ. Sci. Technol. China, 53, 0503-1-0503-10, <http://doi.org/10.52396/JUSTC-2022-0160>, 2023.

699 Huntington K. W. and Petersen S. V.: Frontiers of carbonate clumped isotope t  
 700 hermometry, Annu. Rev. Earth Planet. Sci., 51, 611-641, <https://doi.org/10.1146/annurev-earth-031621-085949>, 2023.

702 Ingall, E. D., and Cappellen, P. V.: Relation between sedimentation rate and bu  
 703 rial of organic phosphorus and organic carbon in marine sediments, Geochim.  
 704 Cosmochim. Acta, 54, 373–386, [https://doi.org/10.1016/0016-7037\(90\)90326-](https://doi.org/10.1016/0016-7037(90)90326-G)  
 705 [G](https://doi.org/10.1016/0016-7037(90)90326-G), 1990.

706 Ivany, L. C., del Río, C. J., Alvarez, M. J., Acosta, R. P., Lohmann, K. C., a  
 707 nd Raigemborn, M. S.: Approaching the Miocene Climatic Optimum in Pata  
 708 gonia (southern Argentina): Temperature seasonality and a potential role for t  
 709 he opening Drake Passage, Paleoclimatogr. Paleoclimatology, 40, e2025PA0051  
 710 00, <https://doi.org/10.1029/2025PA005100>, 2025.

711 Kender, S., Bogus, K., Pedersen, G. K., Dybkjær, K., Mather, T. A., Mariani,  
 712 E., Ridgwell, A., Riding, J. B., Wagner, T., Hesselbo, S. P., and Leng, M. J.:  
 713 Paleocene/Eocene carbon feedbacks triggered by volcanic activity, Nat. Com  
 714 mun., 12, 5186, <https://doi.org/10.1038/s41467-021-25536-0>, 2021.

715 Kipp, M. A., Stüeken, E. E., Yun, M., Bekker, A., and Buick, R.: Pervasive a



716      ero-bic nitrogen cycling in the surface ocean across the Paleopro-terozoic Er  
 717      a, *Earth Planet. Sci. Lett.*, 500,117-126, [https://doi.org/10.1016/j.epsl.2018.08.0](https://doi.org/10.1016/j.epsl.2018.08.007)  
 718      [07](https://doi.org/10.1016/j.epsl.2018.08.007), 2018.

719      Kürschner, W. M., Kvaček, Z., and Dilcher, D. L.: The impact of Miocene at  
 720      mospheric carbon dioxide fluctuations on climate and the evolution of terrest  
 721      rial ecosystems, *Proc. Natl. Acad. Sci.*, 105, 449-453, [http://doi.org/10.1073/p](http://doi.org/10.1073/pnas.0708588105)  
 722      [nas.0708588105](http://doi.org/10.1073/pnas.0708588105), 2008.

723      Lamb, H. F., Leng, M. J., Telford, R. J., Ayenew, T., and Umer, M.: Oxygen  
 724      and carbon isotope composition of authigenic carbonate from an Ethiopian la  
 725      ke: a climate record of the last 2000 years, *The Holocene*, 17, 515-524, [http:](http://doi.org/10.1177/0959683607076452)  
 726      [//doi.org/10.1177/0959683607076452](http://doi.org/10.1177/0959683607076452), 2007.

727      Lehmann, M. F., Bernasconi, S. M., Barbieri, A., and Mckenzie, J. A.: Preserv  
 728      ation of organic matter and alteration of its carbon and nitrogen isotope com  
 729      position during simulated and in situ early sedimentary diagenesis, *Geochim.*  
 730      *Cosmochim. Acta*, 2002, 3573-3584, [https://doi.org/10.1016/S0016-7037\(02\)009](https://doi.org/10.1016/S0016-7037(02)00968-7)  
 731      [68-7](https://doi.org/10.1016/S0016-7037(02)00968-7), 2002.

732      Lei Q., Fu X., and Lu Y.: Petroleum geological features of Tertiary terrestrial  
 733      Lunpola basin, Tibet,in: *Geology of Fossil Fuels --- Oil and Gas : Proceedin*  
 734      *gs of the 30th International Geological Congress*, edited by: Sun, Z.C., Wan  
 735      g, T.B., Ye, D.L., and Song, G.J., 11, <https://doi.org/10.1201/9780429087837>,  
 736      1997.





- 737 Leng, M. J. and Marshall, J. D.: Palaeoclimate interpretation of stable isotope  
 738 data from lake sediment archives, *Quat. Sci. Rev.*, 23, 811-831, [https://doi.org/](https://doi.org/10.1016/j.quascirev.2003.06.012)  
 739 [10.1016/j.quascirev.2003.06.012](https://doi.org/10.1016/j.quascirev.2003.06.012), 2004.
- 740 Li, L., Garzione, C. N., Lu, H., and Quade, J.: Neogene surface uplift of the  
 741 Lunpola Basin in Central Tibet: Implications for uplifting and flattening of o  
 742 rogenic plateaus, *Earth Planet. Sci. Lett.*, 646, 118961, [https://doi.org/10.1016/](https://doi.org/10.1016/j.epsl.2024.118961)  
 743 [j.epsl.2024.118961](https://doi.org/10.1016/j.epsl.2024.118961), 2024.
- 744 Li, W., Wang, J., Jia, C., Lu, S., Li, J., Zhang, P., Wei, Y., Song, Z., Chen,  
 745 G., and Zhou, N.: Carbon isotope fractionation during methane transport thro  
 746 ugh tight sedimentary rocks: phenomena, mechanisms, characterization, and i  
 747 mplications, *Geosci. Front.*, 15, 101912, [https://doi.org/10.1016/j.gsf.2024.1019](https://doi.org/10.1016/j.gsf.2024.101912)  
 748 [12](https://doi.org/10.1016/j.gsf.2024.101912), 2024.
- 749 Lin, Z., Strauss, H., Peckmann, J., Roberts, A. P., Lu, Y., Sun, X., Chen, T., a  
 750 nd Harzhauser, M.: Seawater sulphate heritage governed early late miocene  
 751 methane consumption in the long-lived lake pannon, *Commun. Earth Enviro*  
 752 *n.*, 4, 207, <https://doi.org/10.1038/s43247-023-00879-2>, 2023.
- 753 Liu, X. and Yin, Z.: Sensitivity of East asian monsoon climate to the uplift of  
 754 the Tibetan Plateau, *Palaeogeogr. Palaeoclimatol. Palaeoecol.*, 183, 223–245,  
 755 [https://doi.org/10.1016/S0031-0182\(01\)00488-6](https://doi.org/10.1016/S0031-0182(01)00488-6), 2002.
- 756 Liu, Q., Li, P., Jin, Z., Sun, Y., Hu, G., Zhu, D., Huang, Z., Liang, X., Zhan  
 757 g, R., and Liu, J.: Organic-rich formation and hydrocarbon enrichment of lac

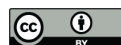

758      ustrine shale strata: A case study of Chang 7 Member, Sci. China Earth Sci.,  
 759      65, 118-138, <https://doi.org/10.1007/s11430-021-9819-y>, 2022.

760      Lourey, M. J., Trull, T. W., and Sigman, D. M.: Sensitivity of  $\delta^{15}\text{N}$  of nitrate,  
 761      surface suspended and deep sinking particulate nitrogen to seasonal nitrate d  
 762      epletion in the Southern Ocean, Glob. Biogeochem. Cycle., 17, 1081, [https://](https://doi.org/10.1029/2002GB001973)  
 763      [doi.org/10.1029/2002GB001973](https://doi.org/10.1029/2002GB001973), 2003.

764      Lu, Y., Meyers, P. A., Eadie, B. J., and Robbins, J. A.: Carbon cycling in Lak  
 765      e Erie during cultural eutrophication over the last century inferred from the  
 766      stable carbon isotope composition of sediments, J. Paleolimn., 43, 261-272, [h](https://doi.org/10.1007/s10933-009-9330-y)  
 767      [tps://doi.org/10.1007/s10933-009-9330-y](https://doi.org/10.1007/s10933-009-9330-y), 2010.

768      Lu, J., Fu, X., Du, Q., Nie, Y., Wei, H., Zhou, G., and Wang, W.: Climate-ind  
 769      uced organic matter enrichment in lacustrine basin: Insights from the Palaeog  
 770      ene–Neogene oil shale in the Lunpola Basin (Tibet, China), Geol. J., 2023,  
 771      58, 4057-4069, <https://doi.org/10.1002/gj.4758>, 2023.

772      Bižić, M., Klintzsch, T., Ionescu, D., Hindiyeh, M. Y., Günthel, M., Muro-Past  
 773      or, A. M., Eckert, W., Urich, T., Keppler, F., and Grossart, H. P.: Aquatic a  
 774      nd terrestrial cyanobacteria produce methane, Sci. Adv., 6, eaax5343, [http://d](http://dx.doi.org/10.1126/sciadv.aax5343)  
 775      [x.doi.org/10.1126/sciadv.aax5343](http://dx.doi.org/10.1126/sciadv.aax5343), 2020.

776      Ma, P., Wang, L., Wang, C., Wu, X., and Wei, Y.: Organic-matter accumulatio  
 777      n of the lacustrine Lunpola oil shale, central Tibetan Plateau: Controlled by  
 778      the paleoclimate, provenance, and drainage system, Int. J. Coal Geol., 147–1



- 779 48, 58–70, <https://doi.org/10.1016/j.coal.2015.06.011>, 2015.
- 780 Ma, P., Wang, C., Meng, J., Ma, C., Zhao, X., Li, Y., and Wang, M.: Late Oligocene-early Miocene evolution of the Lunpola Basin, central Tibetan Plateau, evidences from successive lacustrine records, *Gondwana Res.*, 48: 224-236, <https://doi.org/10.1016/j.gr.2017.04.023>, 2017.
- 784 Macko, S. A., Fogel, M. L., Hare, P. E., and Hoering, T. C.: Isotopic fractionation of nitrogen and carbon in the synthesis of amino acids by microorganisms, *Chemical Geology: Isotope Geoscience section*, 65, 79-92, [https://doi.org/10.1016/0168-9622\(87\)90064-9](https://doi.org/10.1016/0168-9622(87)90064-9), 1987.
- 788 Mao, Z., Meng, Q., Fang, X., Zhang, T., Wu, F., Yang, Y., Zhang, W., Zan, J., and Tan, M.: Recognition of tuffs in the middle-upper Dingqinghu fm., Lunpola basin, central Tibetan plateau: constraints on stratigraphic age and implications for paleoclimate, *Paleogeogr. Paleoclimatol. Paleoecol.*, 525, 44-56, <https://doi.org/10.1016/j.palaeo.2019.03.040>, 2019.
- 793 Martens C. S. and Berner R. A.: Methane production in the interstitial waters of sulfate-depleted marine sediments, *Science*, 185, 1167-1169, <http://dx.doi.org/10.1126/science.185.4157.1167>, 1974.
- 796 McCormack, J., Viehberg, F., Akdemir, D., Immenhauser, A., and Kwiecien, O.: Ostracods as ecological and isotopic indicators of lake water salinity change: the Lake Van example, *Biogeosciences*, 16, 2095-2114, <https://doi.org/10.5194/bg-16-2095-2019>, 2019.

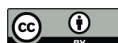

800 Meister, P., Liu, B., Khalili, A., Böttcher, M.E., and Jørgensen, B.B.: Factors c  
 801 ontrolling the carbon isotope composition of dissolved inorganic carbon and  
 802 methane in marine porewater: an evaluation by reaction-transport modelling,  
 803 J. Mar. Syst., 200, 103227, <https://doi.org/10.1016/j.jmarsys.2019.103227>, 201  
 804 9.

805 Methner, K., Campani, M., Fiebig, J., Löffler, N., Kempf, O., and Mulch, A.:  
 806 Middle Miocene long-term continental temperature change in and out of pace  
 807 with marine climate records, Sci Rep, 10, 7989, <https://doi.org/10.1038/s415>  
 808 [98-020-64743-5](https://doi.org/10.1038/s41598-020-64743-5), 2020.

809 Mettam, C., Zerkle, A. L., Claire, M. W., Prave, A. R., Poulton, S. W., and J  
 810 unium, C. K.: Anaero-bic nitrogen cycling on a Neoarchaeon ocean margin,  
 811 Earth Planet. Sci. Lett., 527, 115800, <https://doi.org/10.1016/j.epsl.2019.11580>  
 812 [0](https://doi.org/10.1016/j.epsl.2019.11580), 2019.

813 Meyers, P. A.: Organic geochemical proxies of paleoceanographic, paleolimnolo  
 814 gic, and paleoclimatic processes, Org. Geochem., 27, 213-250, <https://doi.org/>  
 815 [10.1016/S0146-6380\(97\)00049-1](https://doi.org/10.1016/S0146-6380(97)00049-1), 1997.

816 Michener, R., and Lajtha, K. (Eds.): Stable isotopes in ecology and environmen  
 817 tal science, John Wiley and Sons, 566pp., ISBN 9780470691854, 2008.

818 Miller, H.M., Chaudhry, N., Conrad, M.E., Bill, M., Kopf, S.H., and Templeto  
 819 n, A.S.: Large carbon isotope variability during methanogenesis under alkalin  
 820 e conditions, Geochim. Cosmochim. Acta, 237, 18-31, <https://doi.org/10.1016/>



- 821 [j.gca.2018.06.007](https://doi.org/10.5194/egusphere-2025-5342), 2018.
- 822 Mor, Z., Assouline, S., Tanny, J., Lensky, I. M., and Lensky, N. G.: Effect of  
 823 water surface salinity on evaporation: The case of a diluted buoyant plume o  
 824 ver the Dead Sea, *Water Resour. Res.*, 54, 1460-1475, [https://doi.org/10.1002/](https://doi.org/10.1002/2017WR021995)  
 825 [2017WR021995](https://doi.org/10.1002/2017WR021995), 2018.
- 826 Mostovaya, A., Wind-Hansen, M., Rousteau, P., Bristow, L. A., and Thamdrup,  
 827 B.: Sulfate-and iron-dependent anaerobic methane oxidation occurring side-by-  
 828 side in freshwater lake sediment, *Limnol. Oceanogr.*, 67, 231-246, [https://doi.](https://doi.org/10.1002/lno.11988)  
 829 [org/10.1002/lno.11988](https://doi.org/10.1002/lno.11988), 2022.
- 830 Müller, P. J. and Suess, E.: Productivity, sedimentation rate, and sedimentary or  
 831 ganic matter in the oceans—I. Organic carbon preservation. *Deep-Sea Res. Pa*  
 832 *rt I-Oceanogr. Res. Pap.*, 26, 1347–1362, [https://doi.org/10.1016/0198-0149\(79\)](https://doi.org/10.1016/0198-0149(79)90003-7)  
 833 [90003-7](https://doi.org/10.1016/0198-0149(79)90003-7), 1979.
- 834 Neumann, T., Stögbauer, A., Walpersdorf, E., Stüben, D., and Kunzendorf, H.:  
 835 Stable isotopes in recent sediments of Lake Arendsee, NE Germany: respons  
 836 e to eutrophication and remediation measures, *Paleogeogr. Paleoclimatol. Pale*  
 837 *oecol.*, 178, 75-90, [https://doi.org/10.1016/S0031-0182\(01\)00403-5](https://doi.org/10.1016/S0031-0182(01)00403-5), 2002.
- 838 Nie, Y., Fu, X., Liu, X., Wei, H., Zeng, S., Lin, F., Wan, Y., and Song, C.: O  
 839 rganic matter accumulation mechanism under global/regional warming: Insight  
 840 from the Late Barremian calcareous shales in the Qiangtang Basin (Tibet),  
 841 *J. Asian Earth Sci.*, 241: 105456, <https://doi.org/10.1016/j.jseaes.2022.105456>,



2023.

Papineau, D., Purohit, R., Goldberg, T., Pi, D., Shields, G. A., Bhu, H., Steele, A., and Fogel, M. L.: High primary productivity and nitrogen cycling after the Paleoproterozoic phosphogenic event in the Aravalli Supergroup, India, *Precambrian Res.*, 171, 37-56, <https://doi.org/10.1016/j.precamres.2009.03.005>, 2009.

Penning, H., Claus, P., Casper, P., and Conrad, R.: Carbon isotope fractionation during acetoclastic methanogenesis by *methanosaeta concilii* in culture and a lake sediment, *Appl. Environ. Microbiol.*, 72, 5648-5652, <https://doi.org/10.1128/AEM.00727-06>, 2006.

Ramstein, G., Fluteau, F., Besse, J., and Joussaume, S.: Effect of orogeny, plate motion and land–sea distribution on Eurasian climate change over the past 30 million years, *Nature*, 386, 788–795, <https://doi.org/10.1038/386788a0>, 1997.

Rickard, D. (Eds.): *Framboids*, Oxford University Press, Oxford Academic, <https://doi.org/10.1093/oso/9780190080112.001.0001>, 2021.

Ritter, A., Mavromatis, V., Dietzel, M., Kwiecien, O., Wiethoff, F., Griesshaber, E., Casella, L. A., Schmahl, W. W., Koelen, J., Neuser, R. D., Leis, A., Buhl, D., Niedermayr, A., Breitenbach, S. F. M., Bernasconi, S. M., and Immenhauser, A.: Exploring the impact of diagenesis on (isotope) geochemical and microstructural alteration features in biogenic aragonite, *Sedimentology*, 64,



863 1354-1380, <https://doi.org/10.1111/sed.12356>, 2017.

864 Robinson, R. S., Kienast, M., Luiza Albuquerque, A., Altabet, M., Contreras,  
 865 S., De Pol Holz, R., Dubois, N., Francois, R., Galbraith, E., Hsu, T., Ivanoc  
 866 hko, T., Jaccard, S., Kao, S., Kiefer, T., Kienast, S., Lehmann, M., Martinez,  
 867 P., Mccarthy, M., Möbius, J., Pedersen, T., Quan, T. M., Ryabenko, E., Sch  
 868 mittner, A., Schneider, R., Schneider-Mor, A., Shigemitsu, M., Sinclair, D., S  
 869 omes, C., Studer, A., Thunell, R., and Yang, J.: A review of nitrogen isotopi  
 870 c alteration in marine sediments, *Paleoceanography*, 2012, 27, PA4203, [https://](https://doi.org/10.1029/2012PA002321)  
 871 [doi.org/10.1029/2012PA002321](https://doi.org/10.1029/2012PA002321), 2012.

872 Rowley, D. and Currie, B.: Palaeo-altimetry of the late Eocene to Miocene Lu  
 873 npola basin, central Tibet, *Nature*, 439, 677-681, <https://doi.org/10.1038/nature>  
 874 [04506](https://doi.org/10.1038/nature), 2006.

875 Schelske, C. L. and Hodell, D. A.: Recent changes in productivity and climate  
 876 of LakeOntario detected by isotopic analysis of sediments, *Limnol. Oceanogr.*,  
 877 36, 961-975, <https://doi.org/10.4319/lo.1991.36.5.0961>, 1991.

878 Shen, R. F., Cai, H., and Gong, W. H.: Transgenic Bt cotton has no apparent  
 879 effect on enzymatic activities or functional diversity of microbial communitie  
 880 s in rhizosphere soil, *Plant Soil*, 285, 149-159, <https://doi.org/10.1007/s11104->  
 881 [006-9000-z](https://doi.org/10.1007/s11104-), 2006.

882 Shukla, A., Mehrotra, R. C., Spicer, R. A., Spicer, T. E. V., and Kumar, M.:  
 883 Cool equatorial terrestrial temperatures and the South Asian monsoon in the

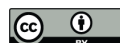

- 884 Early Eocene: Evidence from the Gurha Mine, Rajasthan, India, *Paleogeogr.*  
 885 *Paleoclimatol. Paleoecol.*, 412, 187–198, <https://doi.org/10.1016/j.palaeo.2014.0>  
 886 [8.004](https://doi.org/10.1016/j.palaeo.2014.08.004), 2014.
- 887 Sigman, D. M., Karsh, K. L., and Casciotti, K. L.: Ocean Process Tracers: Nit  
 888 rogen Isotopes in the Ocean, in: *Encyclopedia of Ocean Sciences*, edited by:  
 889 Steel, J., Thorpe, S., and Turekian, K., Academic Press, 4138–4153, [https://hdl.](https://hdl.handle.net/102.100.100/534313)  
 890 [handle.net/102.100.100/534313](https://hdl.handle.net/102.100.100/534313), 2009.
- 891 Spicer, R. A., Su, T., Valdes, P. J., Farnsworth, A., Wu, F., Shi, G., Spicer, T.  
 892 E. V., and Zhou, Z.: The topographic evolution of the Tibetan Region as rev  
 893 ealed by palaeontology, *Palaeobiodiversity Palaeoenvironments*, 101, 213–243,  
 894 <https://doi.org/10.1007/s12549-020-00452-1>, 2021.
- 895 Su, B., Sun, J., and Jin, C.: Orbital forcing of climatic changes on the central  
 896 tibetan plateau reveals late oligocene to early miocene south asian monsoon  
 897 evolution, *Geophys. Res. Lett.*, 49, e2021GL097428, [https://doi.org/10.1029/20](https://doi.org/10.1029/2021GL097428)  
 898 [21GL097428](https://doi.org/10.1029/2021GL097428), 2022.
- 899 Sun, F., Hu, W., Wang, X., Cao, J., Fu, B., Wu, H., and Yang, S.: Methanoge  
 900 n microfossils and methanogenesis in permian lake deposits, *Geology*, 49, 13  
 901 –18, <https://doi.org/10.1130/G47857.1>, 2020.
- 902 Sun, F., Hu, W., Cao, J., Wang, X., Zhang, Z., Ramezani, J., and Shen, S.: Su  
 903 stained and intensified lacustrine methane cycling during Early Permian clima  
 904 te warming, *Nat. Commun.*, 13, 4856, <https://doi.org/10.1038/s41467-022-3243>





- 8-2, 2022.
- Sun, F., Luo, G., Pancost, R. D., Dong, Z., Li, Z., Wang, H., Chen, Z., and Xie, S.: Methane fueled lake pelagic food webs in a cretaceous greenhouse world, *Proc. Natl. Acad. Sci.*, 121, e2411413121, <https://doi.org/10.1073/pnas.2411413121>, 2024.
- Talbot, M. R.: Nitrogen isotopes in palaeolimnology, in: *Tracking environmental change using lake sediments: physical and geochemical methods*, edited by: Last, W.M. and Smol, J.P., Springer, Dordrecht ,2, 401-439, [https://doi.org/10.1007/0-306-47670-3\\_15](https://doi.org/10.1007/0-306-47670-3_15), 2002.
- Taylor, K. G. and Macquaker, J. H. S.: Iron minerals in marine sediments record chemical environments, *Elements*, 7, 113–118, <https://doi.org/10.2113/gselements.7.2.113>, 2011.
- Tegler, L. A., Horner, T. J., Galy, V. V., Bent, S., Wang, Y., Kim, H. H., Meté, O. Z., and Nielsen, S. G.: Distribution and drivers of organic carbon sedimentation along the continental margins, *AGU Adv.*, 5, e2023AV001000, <https://doi.org/10.1029/2023AV001000>, 2024.
- Teranes, J. L., Mckenzie, J. A., Lotter, A. F., and Sturm, M.: Stable isotope response to lake eutrophication: calibration of a high-resolution lacustrine sequence from Baldeggersee, Switzerland, *Limnol. Oceanogr.*, 44, 320-333, <https://doi.org/10.4319/lo.1999.44.2.0320>, 1999.
- Teranes, J. L. and Bernasconi, S. M.: Factors controlling  $\delta^{13}\text{C}$  values of sediment



926 entary carbon in hypertrophic Baldeggersee, Switzerland, and implications for  
 927 interpreting isotope excursions in lake sedimentary records, *Limnol. Oceanog*  
 928 *r.*, 50, 914-922, <https://doi.org/10.4319/lo.2005.50.3.0914>, 2005.

929 Thottathil, S. D., Reis, P. C. J., and Prairie, Y. T.: Variability and controls of  
 930 stable carbon isotopic fractionation during aerobic methane oxidation in temp  
 931 erate lakes, *Front. Environ. Sci.*, 10, 833688, [https://doi.org/10.3389/fenvs.202](https://doi.org/10.3389/fenvs.2022.833688)  
 932 [2.833688](https://doi.org/10.3389/fenvs.2022.833688), 2022.

933 Tremblin, M., Khozyem, H., Adatte, T., Spangenberg, J. E., Fillon, C., Grauls,  
 934 A., Hunger, T., Nowak, A., Lauchli, C., Lasseur, E., Roig, J., Serrano, O., C  
 935 alassou, S., Guillocheau, F., and Castelltort, S.: Mercury enrichments of the  
 936 Pyrenean foreland basins sediments support enhanced volcanism during the P  
 937 aleocene-Eocene thermal maximum (PETM), *Glob. Planet. Change*, 212, 1037  
 938 94, <https://doi.org/10.1016/j.gloplacha.2022.103794>, 2022.

939 Tyson, R. V.: Sedimentation rate, dilution, preservation and total organic carbon:  
 940 some results of a modelling study, *Org. Geochem.*, 32, 333–339, [https://doi.](https://doi.org/10.1016/S0146-6380(00)00161-3)  
 941 [org/10.1016/S0146-6380\(00\)00161-3](https://doi.org/10.1016/S0146-6380(00)00161-3), 2001.

942 Valentine, D.L., Chidthaisong, A., Rice, A., Reeburgh, W.S., and Tyler, S.C.: C  
 943 arbon and hydrogen isotope fractionation by moderately thermophilic methano  
 944 gens, *Geochim. Cosmochim. Acta*, 68, 1571-1590, [https://doi.org/10.1016/j.gca.](https://doi.org/10.1016/j.gca.2003.10.012)  
 945 [2003.10.012](https://doi.org/10.1016/j.gca.2003.10.012), 2004.

946 Wang, C., Zhao, X., Liu, Z., Lippert, P. C., Graham, S. A., Coe, R. S., Yi, H.,



- 947 Zhu, L., Liu, S., and Li, Y.: Constraints on the early uplift history of the  
 948 Tibetan Plateau, *Proc. Natl. Acad. Sci.*, 105, 4987-4992, <https://doi.org/10.1073/pnas.0703595105>, 2008.
- 949  
 950 Wang, G., Jia, Y., and Li, W.: Effects of environmental and biotic factors on c  
 951 arbon isotopic fractionation during decomposition of soil organic matter, *Sci*  
 952 *Rep.*, 5, 11043, <https://doi.org/10.1038/srep11043>, 2015.
- 953 Wang, D., Liu, Y., Zhang, J., Lang, Y., Li, Z., Tong, Z., Xu, L., Su, Z., and  
 954 Niu, J.: Controls on marine primary productivity variation and organic matter  
 955 accumulation during the Late Ordovician-Early Silurian transition, *Mar. Pet.*  
 956 *Geol.*, 142, 105742, <https://doi.org/10.1016/j.marpetgeo.2022.105742>, 2022.
- 957 Wang, J., Wang, Z., Fu, X., Wang, X., Wilde, S.A., Fu, Y., Lin, J., Wei, H.,  
 958 Shen, L., Rao, G., and Mansour, A.: Control of stepwise subduction and sla  
 959 b breakoff on volcanism and uplift in the Tibetan Plateau, *Earth Planet. Sci.*  
 960 *Lett.*, 647, 119057, <https://doi.org/10.1016/j.epsl.2024.119057>, 2024.
- 961 Wang, L., Li, Y., Shen, L., Han, Z., Peng, H., Li, X., and Wei, Y.: Sedimentar  
 962 y evolution and hydrocarbon resource potential of Cenozoic continental basin  
 963 s in the Tibetan Plateau, *Acta Petrol. Sin.*, 41, 1101-1119, <https://doi.org/10.18654/1000-0569/2025.03.20>, 2025.
- 964  
 965 Wei, W., Lu, Y., Xing, F., Liu, Z., Pan, L., and Algeo, T. J.: Sedimentary faci  
 966 es associations and sequence stratigraphy of source and reservoir rocks of th  
 967 e lacustrine Eocene Niubao Formation (Lunpola Basin, central Tibet), *Mar. P*



968 et. Geol., 86, 1273–1290, <https://doi.org/10.1016/j.marpetgeo.2017.07.032>, 201

969 7.

970 Whiticar, M. J.: Carbon and hydrogen isotope systematics of bacterial formatio

971 n and oxidation of methane, Chem. Geol., 161, 291-314, <https://doi.org/10.10>

972 [16/S0009-2541\(99\)00092-3](https://doi.org/10.1016/S0009-2541(99)00092-3), 1999.

973 Wynn, J. G.: Carbon isotope fractionation during decomposition of organic matt

974 er in soils and paleosols: Implications for paleoecological interpretations of p

975 aleosols, Paleogeogr. Paleoclimatol. Paleoecol., 251, 437-448, <https://doi.org/1>

976 [0.1016/j.palaeo.2007.04.009](https://doi.org/10.1016/j.palaeo.2007.04.009), 2007.

977 Xia, L., Cao, J., Stüeken, E. E., Hu, W., and Zhi, D.: Linkages between nitrog

978 en cycling, nitrogen isotopes, and environmental properties in paleo-lake basi

979 ns, Geol. Soc. Am. Bull., 134, 2359-2372, <https://doi.org/10.1130/B36290.1>, 2

980 022.

981 Xie, Y., Balázs, A., Gerya, T., and Xiong, X.: Uplift of the Tibetan Plateau dr

982 iven by mantle delamination from the overriding plate, Nat. Geosci., 17, 683

983 -688, <https://doi.org/10.1038/s41561-024-01473-7>, 2024.

984 Xie, G., Li, J., Yao, Y., Wang, S., Sun, B., Ferguson, D. K., Li, C., Li, M.,

985 Deng, T., and Wang, Y.: Palynological evidence reveals vegetation succession

986 in the central qinghai-tibet plateau during the late oligocene to early Mioce

987 ne, J. Syst. Evol., 63, 53-61, <https://doi.org/10.1111/jse.13168>, 2025.

988 Yang, Y., Nie, J., Miao, Y., Wan, S., and Jonell, T. N.: Tibetan Plateau uplift

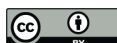

989 and environmental impacts: New progress and perspectives, *Front. Earth Sci.*,  
990 10, 1020354, <https://doi.org/10.3389/feart.2022.1020354>, 2022.

991 Zeng, S., Wang, J., Fu, X., Feng, X., and Wang, D.: Controls on organic matt  
992 er enrichment of the early-middle miocene lacustrine oil shale, central tibet  
993 (sw china): new insights from clay minerals and geochemistry, *J. Asian Eart*  
994 *h Sci.*, 262, 106007, <https://doi.org/10.1016/j.jseacs.2024.106007>, 2024.

995 Zhang, M., Guo, Z., Xu, S., Barry, P. H., Sano, Y., Zhang, L., Halldórsson, S.  
996 A., Chen, A., Cheng, Z., Liu, C., Li, S., Lang, Y., Zheng, G., Li, Z., Li, L.,  
997 and Li, Y.: Linking deeply-sourced volatile emissions to plateau growth dyn  
998 amics in southeastern Tibetan Plateau, *Nat. Commun.*, 12, 4157, [https://doi.or](https://doi.org/10.1038/s41467-021-24415-y)  
999 [g/10.1038/s41467-021-24415-y](https://doi.org/10.1038/s41467-021-24415-y), 2021.

1000 Zhang, R., Jiang, D., Zhang, C., and Zhang, Z.: Distinct effects of Tibetan Pla  
1001 teau growth and global cooling on the eastern and central Asian climates du  
1002 ring the Cenozoic, *Glob. Planet. Change*, 218, 103969, [https://doi.org/10.1016/](https://doi.org/10.1016/j.gloplacha.2022.103969)  
1003 [j.gloplacha.2022.103969](https://doi.org/10.1016/j.gloplacha.2022.103969), 2022.

1004 Zhang, Q., Zhang, J., Ma, C., Feng, Z., Tang, W., and Fang, X.: Tibetan plate  
1005 au uplift changed the Asian climate and regulated its responses to orbital for  
1006 cing during the late Eocene to early Miocene, *J. Geophys. Res.-Atmos.*, 130,  
1007 e2024JD042872, <https://doi.org/10.1029/2024JD042872>, 2025.

1008 Zhao, Z., Lu, H., Wang, S., Li, H., Li, C., Liu, D., Pan, J., Zheng, Y., and B  
1009 ai, M.: The Cenozoic multiple-stage uplift of the Qiangtang Terrane, Tibetan



1010 plateau, *Front. Earth Sci.*, 10, 818079, <https://doi.org/10.3389/feart.2022.818079>  
 1011 2, 2022.

1012 Zhou, K., Zhang, S., Yang, M., Lu, J., Gao, R., Tong, L., Yin, L., Zhang, P.,  
 1013 Wang, W., Liu, H., Shao, L., Hilton, J.: Palaeoclimatic influence on lake pal  
 1014 aeoenvironment and organic matter accumulation in the Middle Jurassic Shim  
 1015 engou formation (Qaidam basin, NW China), *Geoenergy Sci. Eng.*, 233, 212  
 1016 581, <https://doi.org/10.1016/j.geoen.2023.212581>, 2024.

1017 Zhu, Z., Chen, J. A., Zeng, Y., Li, H., Yan, H., and Ren, S.: Research on the  
 1018 carbon isotopic composition of organic matter from Lake Chenghai and Caoh  
 1019 ai Lake sediments, *Chin. J. Geochem.*, 30, 107-113, [https://doi.org/10.1007/s1](https://doi.org/10.1007/s11631-011-0491-9)  
 1020 [1631-011-0491-9](https://doi.org/10.1007/s11631-011-0491-9), 2011.

1021 Zhu, Z., Chen, J., Zeng, Y.: Abnormal positive  $\delta^{13}\text{C}$  values of carbonate in La  
 1022 ke Caohai, southwest China, and their possible relation to lower temperature,  
 1023 *Quat. Int.*, 286, 85-93, <https://doi.org/10.1016/j.quaint.2012.06.004>, 2013.

1024 Zhuang, Q., Guo, M., Melack, J. M., Lan, X., Tan, Z., Oh, Y., and Leung, L.  
 1025 R.: Current and future global lake methane emissions: A process-based mode  
 1026 ling analysis, *J. Geophys. Res.-biogeo.*, 128, e2022JG007137, [https://doi.org/10.](https://doi.org/10.1029/2022JG007137)  
 1027 [1029/2022JG007137](https://doi.org/10.1029/2022JG007137), 2023.
